# Supplementary material for: Telomere length regulation by Rif1 protein from Hansenula polymorpha
Source: eLife journal article supplement (doi:10.7554/elife.75010), 2022-01-24
Supplement: fig1-data2 [file elife-75010-fig1-data2-v1.zip]

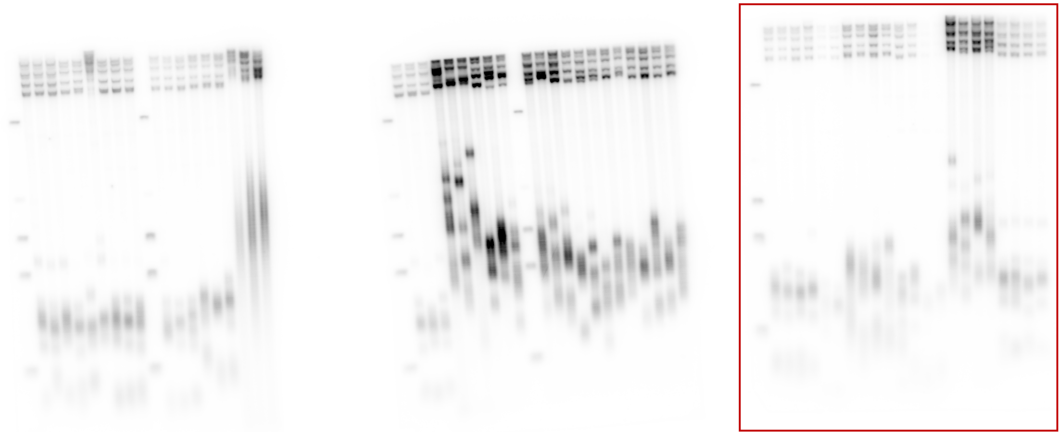

Red square marks the area shown in Figure 1B

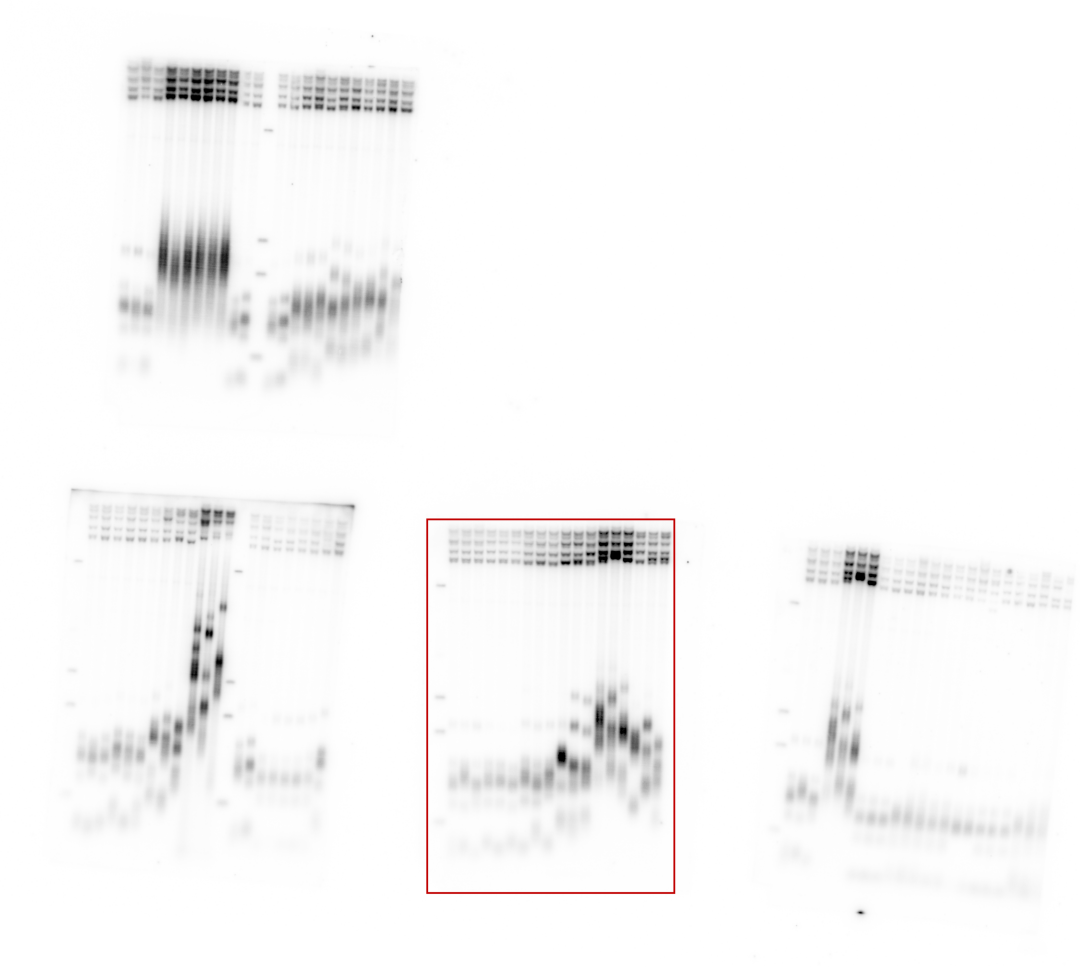

Red square marks the area shown in Figure 1E (the raw unedited blot is in the Figure 1 - source data 3 folder).

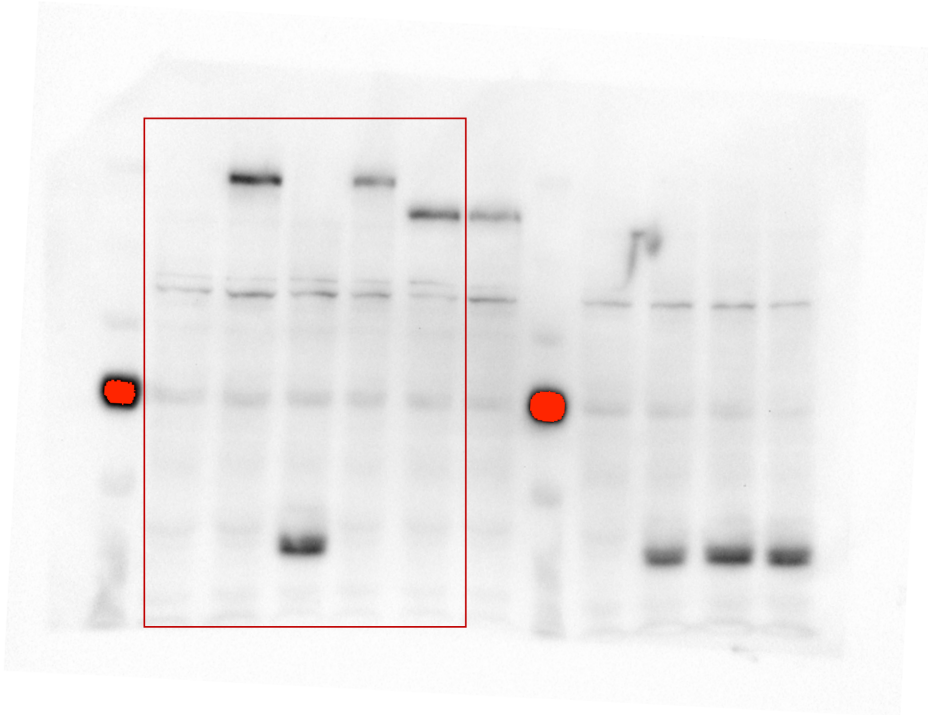

Red square marks the area shown in Figure 1F ( $\alpha$ -HA blot)

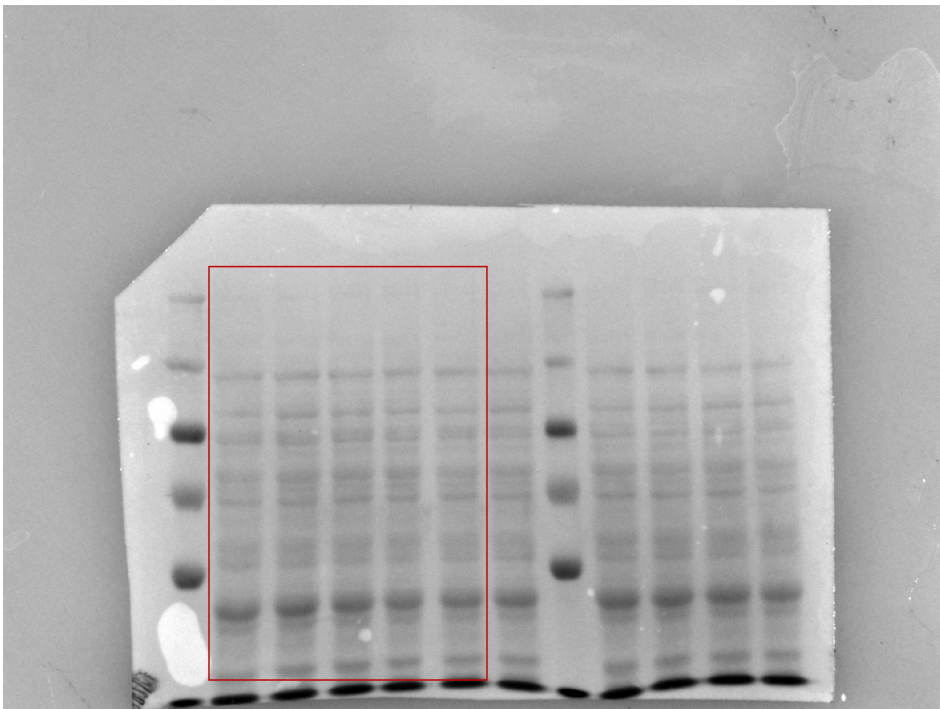

Red square marks the area shown in Figure 1F (ponceau)
