# Supplementary material for: Telomere length regulation by Rif1 protein from Hansenula polymorpha
Source: eLife journal article supplement (doi:10.7554/elife.75010), 2022-01-24
Supplement: fig3-figsupp1-data1 [file Fig. 3 - suppl. 1 labels.pdf › Figure 3 - figure supplement 1 - source data 1/Fig. 3 - suppl. 1 labels.pdf]

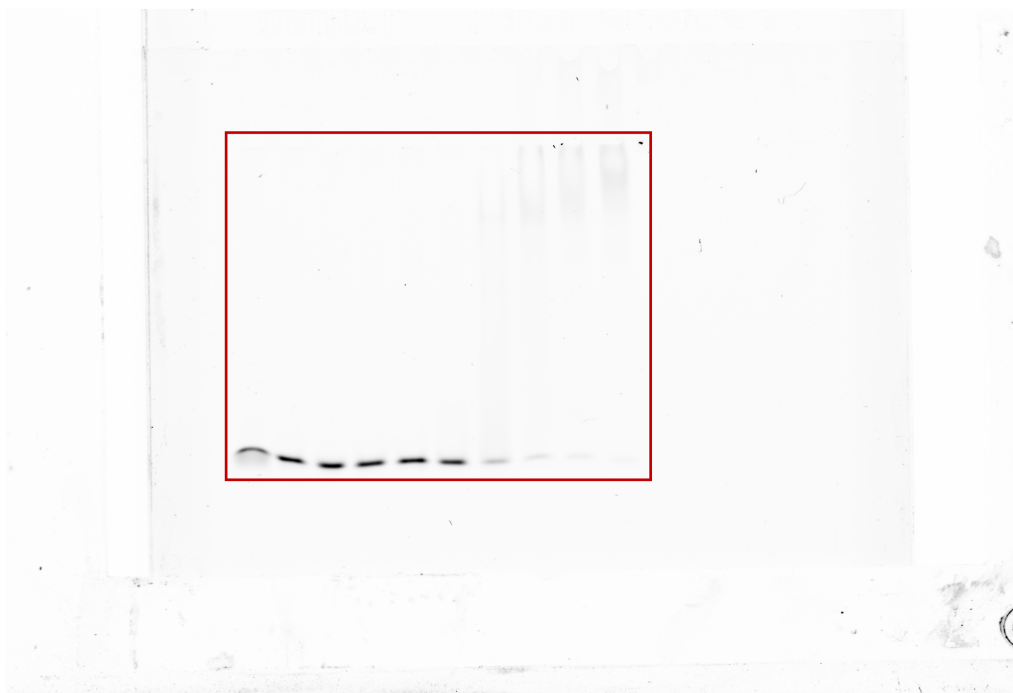

Red square marks the area shown in Figure 3 - figure supplement 1A (Tel4(G)).

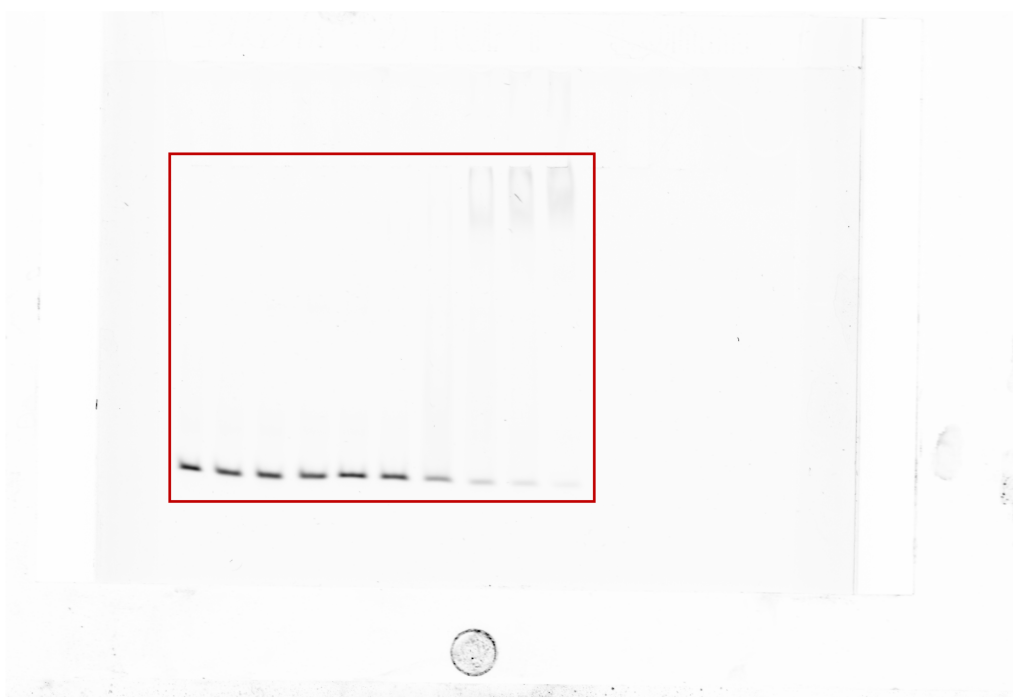

Red square marks the area shown in Figure 3 - figure supplement 1A (Tel4(GC)).

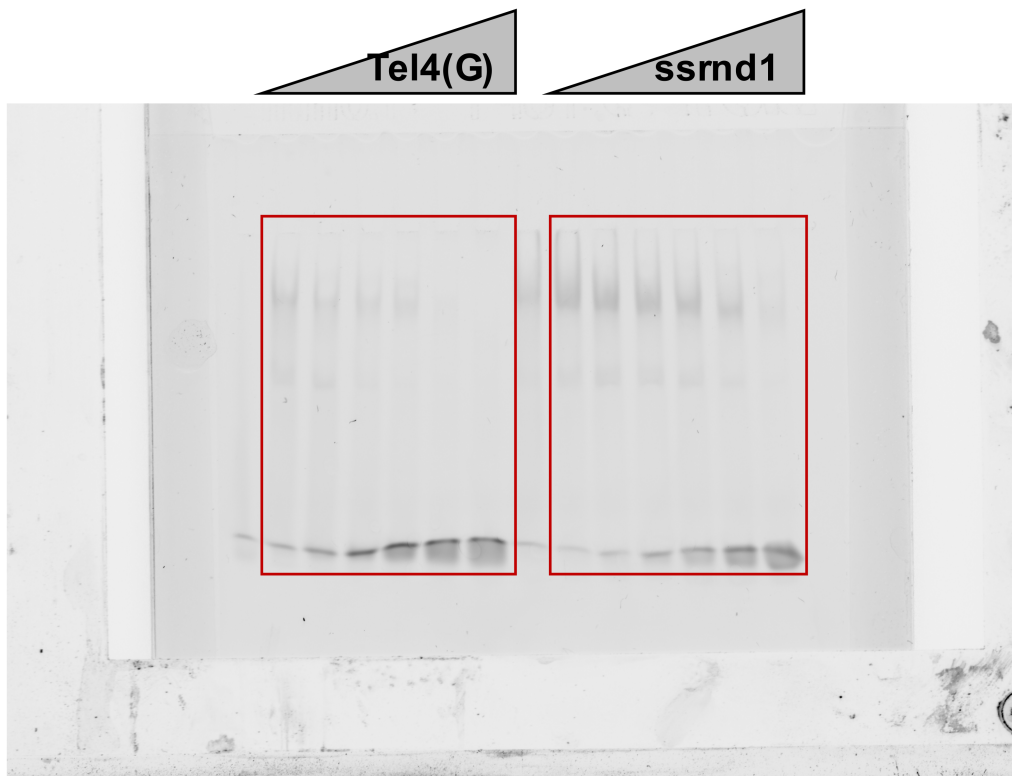

Red square marks the area shown in Figure 3 - figure supplement 1B (Tel4(G) and ssrnd1).

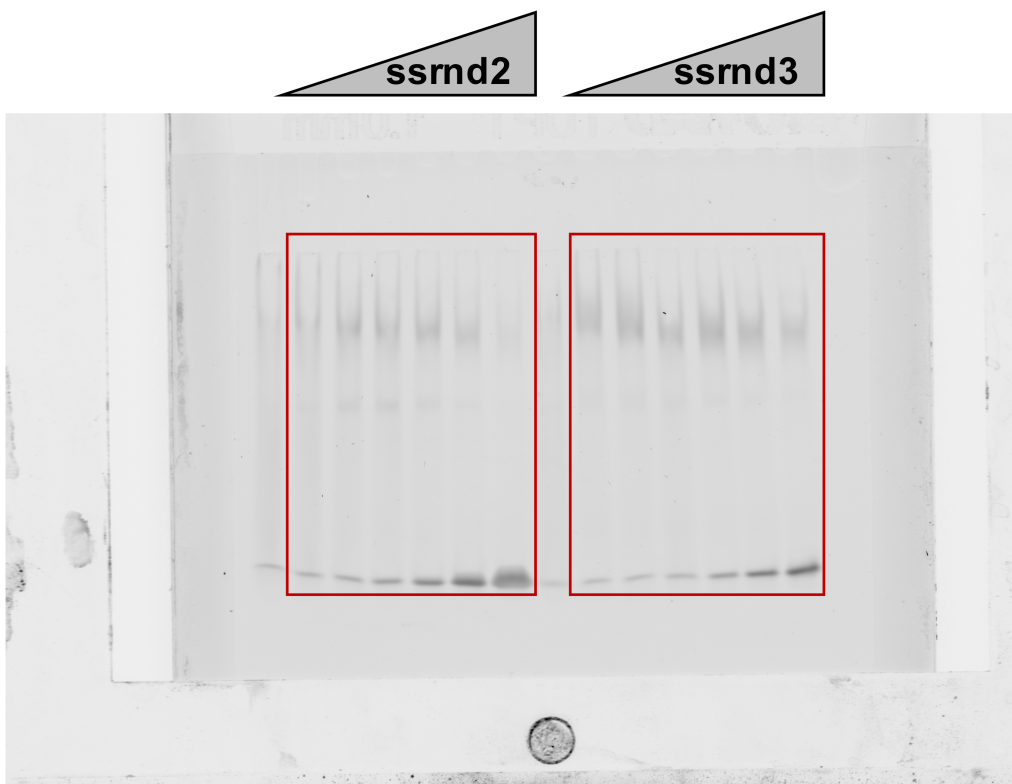

Red square marks the area shown in Figure 3 - figure supplement 1B (ssrnd2 and ssrnd3).

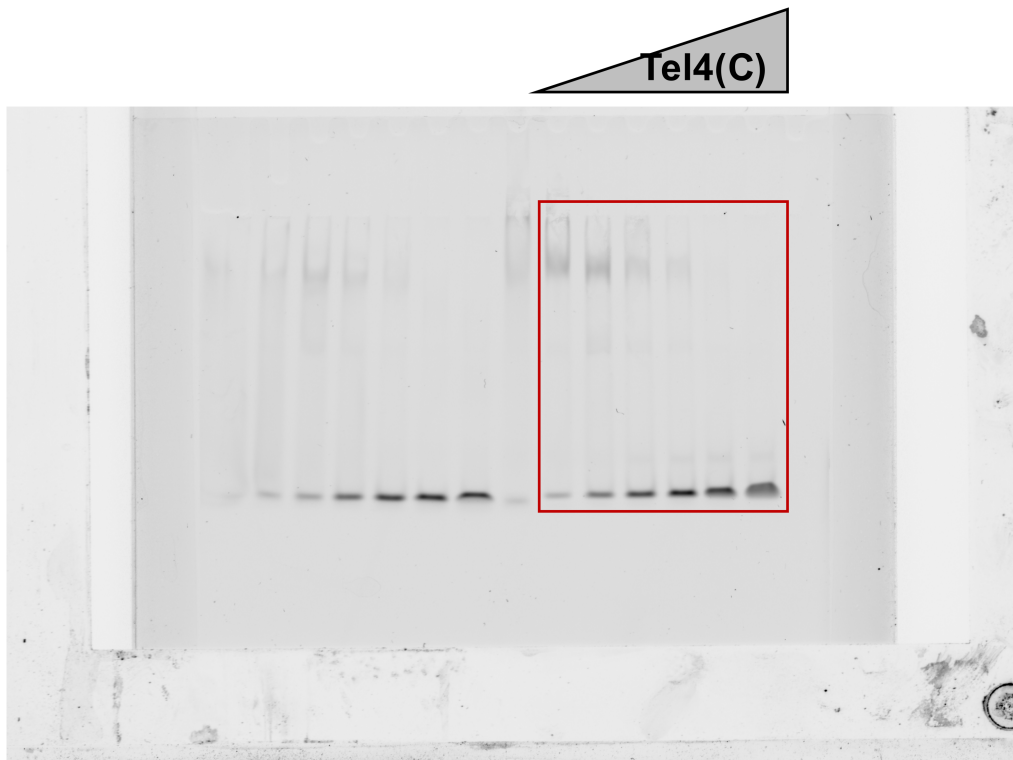

Red square marks the area shown in Figure 3 - figure supplement 1B (Tel4(C)).

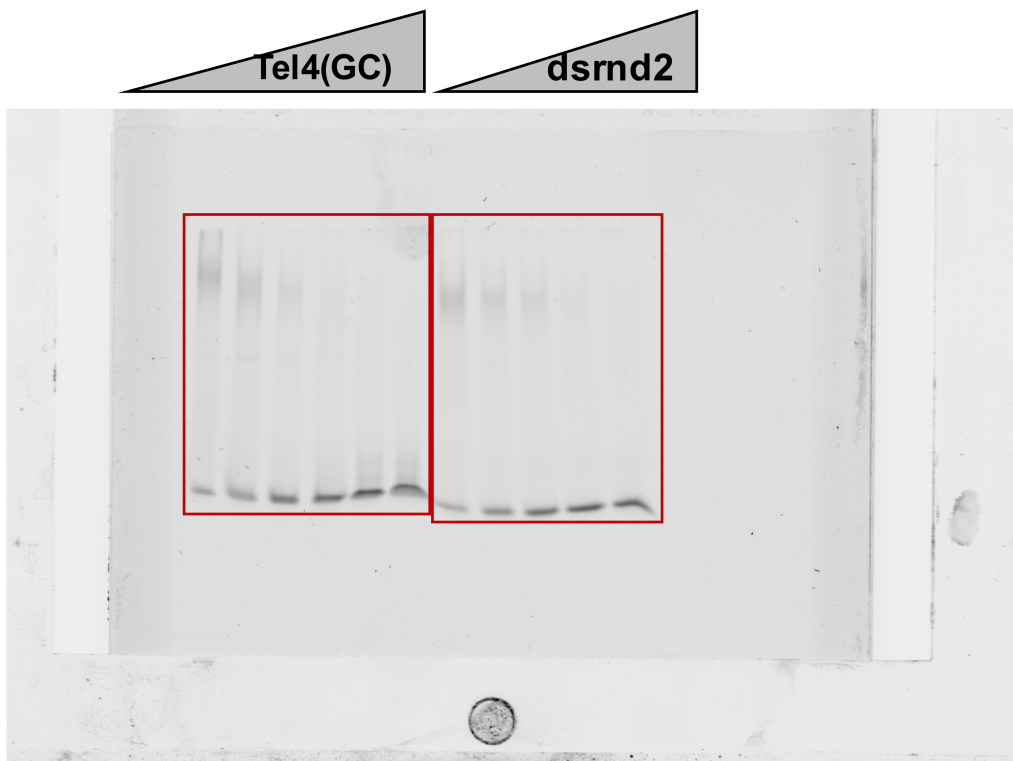

Red square marks the area shown in Figure 3 - figure supplement 1B (Tel4(GC) and dsrnd2).

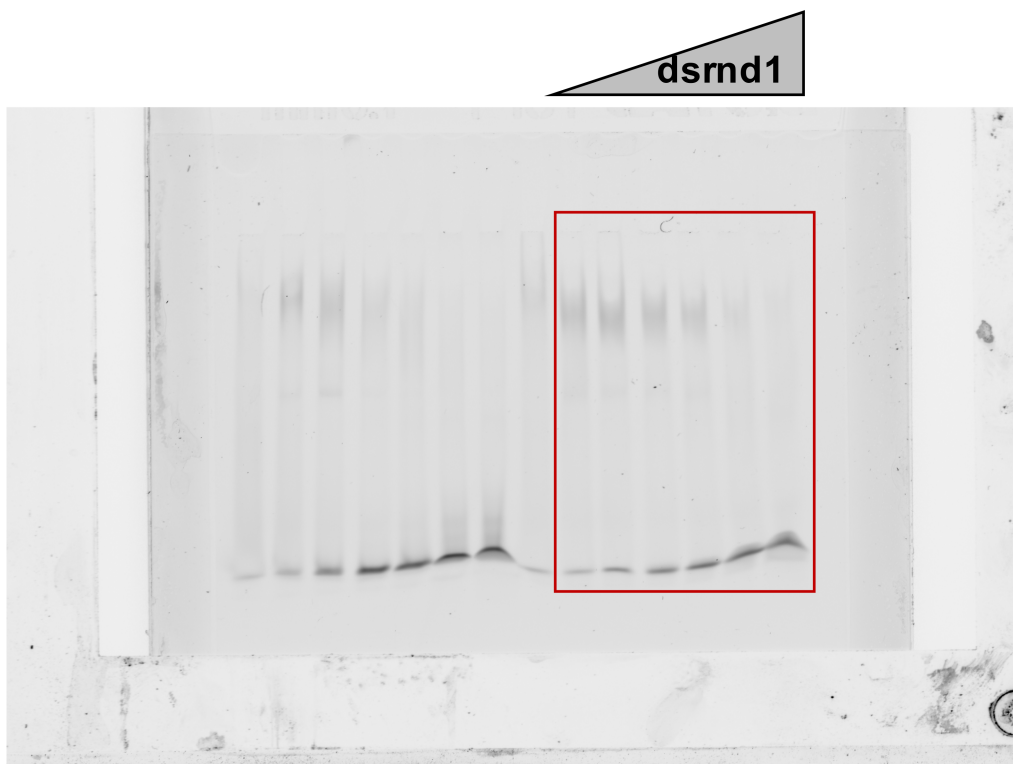

Red square marks the area shown in Figure 3 - figure supplement 1B (dsrnd1).
