# Supplementary material for: Telomere length regulation by Rif1 protein from Hansenula polymorpha
Source: eLife journal article supplement (doi:10.7554/elife.75010), 2022-01-24
Supplement: fig4-data2 [file Fig. 4 labels.pdf › Figure 4 - source data 2/Fig. 4 labels.pdf]

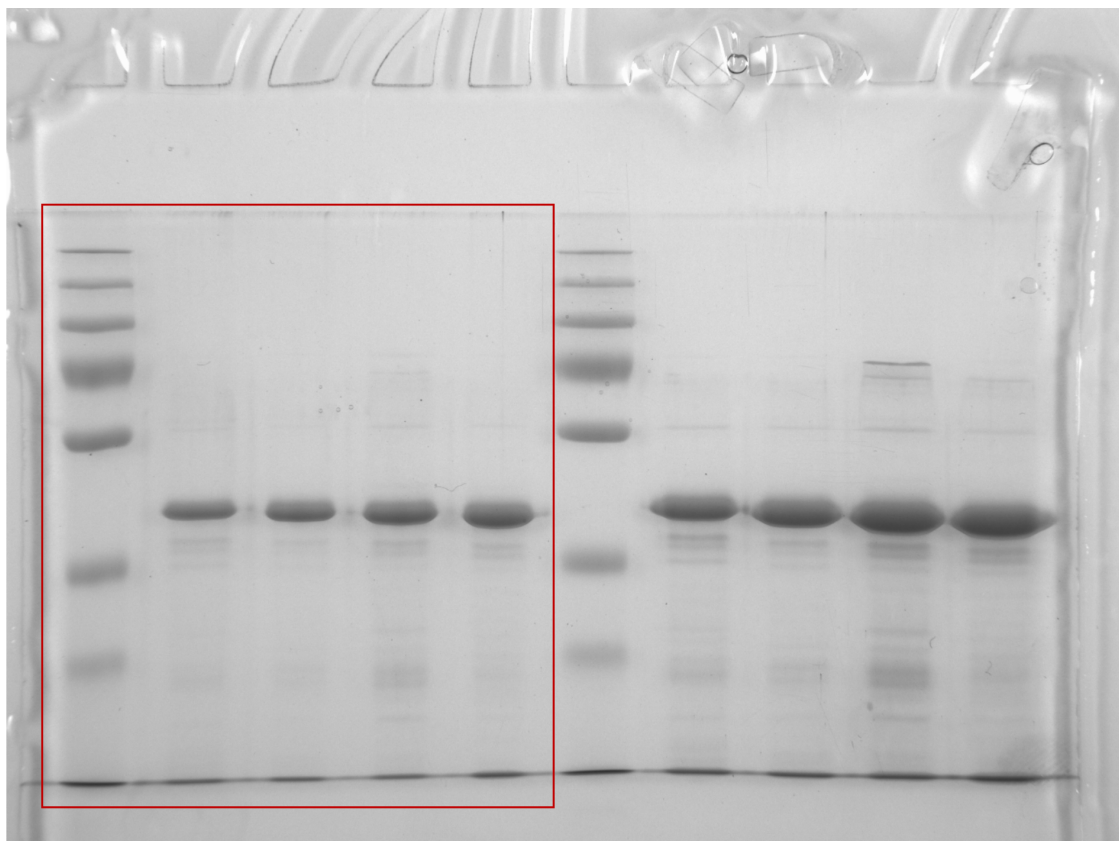

Red square marks the area shown in Figure 4B.

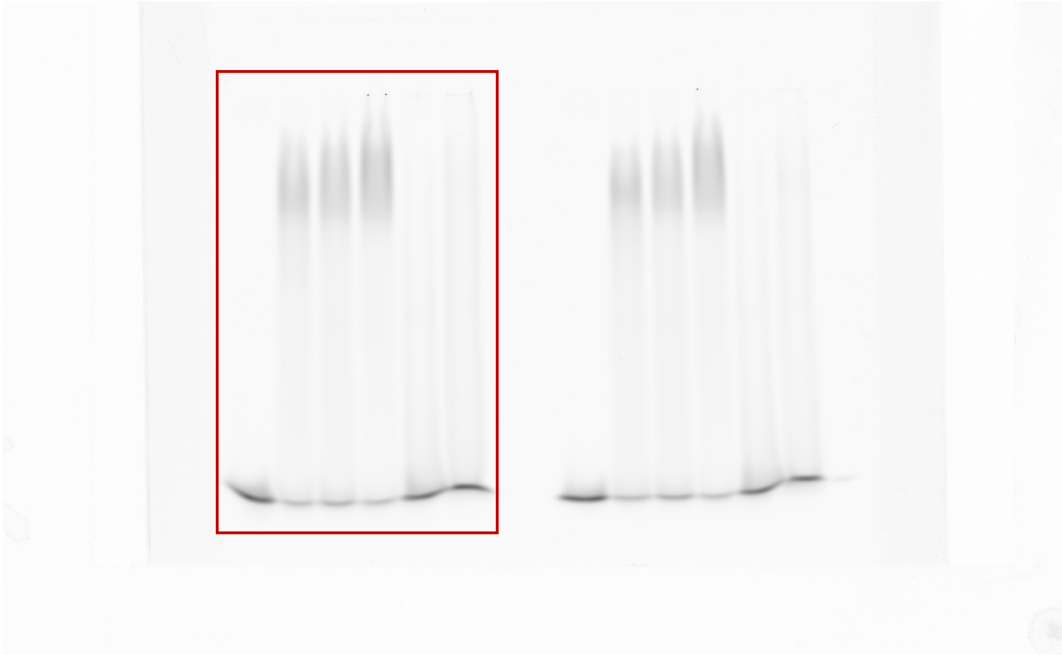

Red square marks the area shown in Figure 4C.

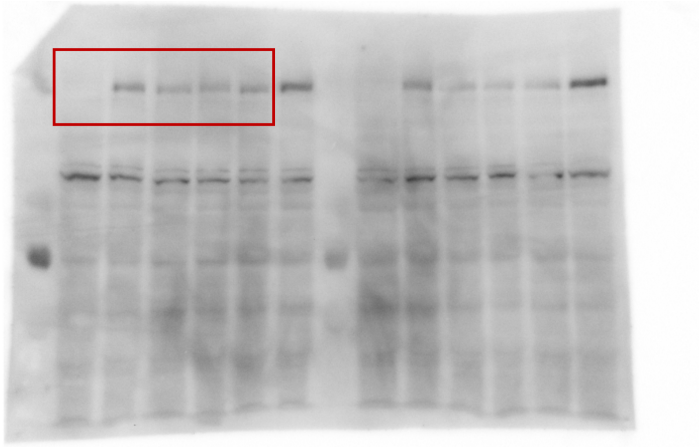

Red square marks the area shown in Figure 4E ( $\alpha$ -HA blot)

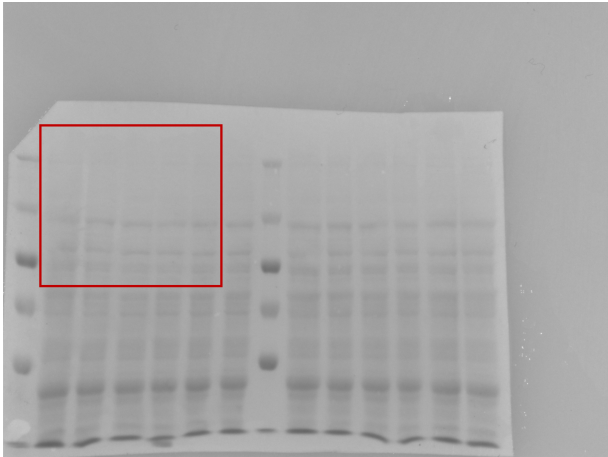

Red square marks the area shown in Figure 4E (Ponceau S)

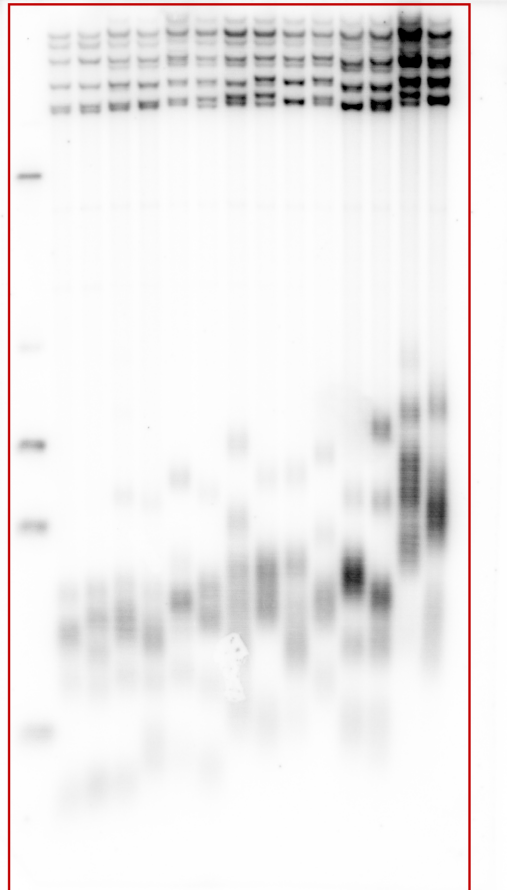

Red square marks the area shown in Figure 4F
