# Supplementary material for: Telomere length regulation by Rif1 protein from Hansenula polymorpha
Source: eLife journal article supplement (doi:10.7554/elife.75010), 2022-01-24
Supplement: fig4-figsupp2-data2 [file Fig. 4 - suppl. 2 labels.pdf › Figure 4 - figure supplement 2 - source data 2/Fig. 4 - suppl. 2 labels.pdf]

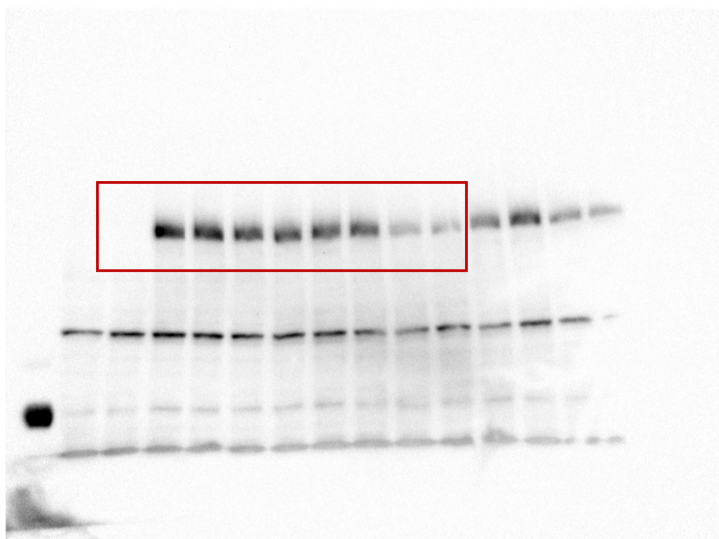

Red square marks the area shown in Figure 4 - figure supplement 2B ( $\alpha$ -HA blot top left).

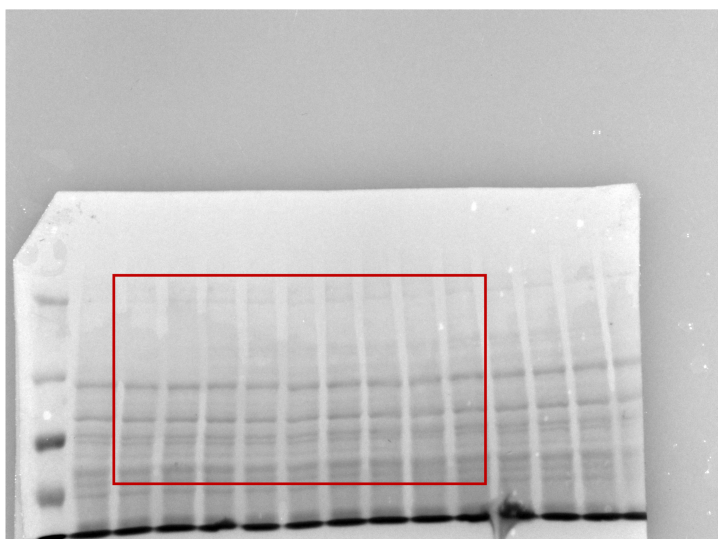

Red square marks the area shown in Figure 4 - figure supplement 2B (ponceau bottom left).

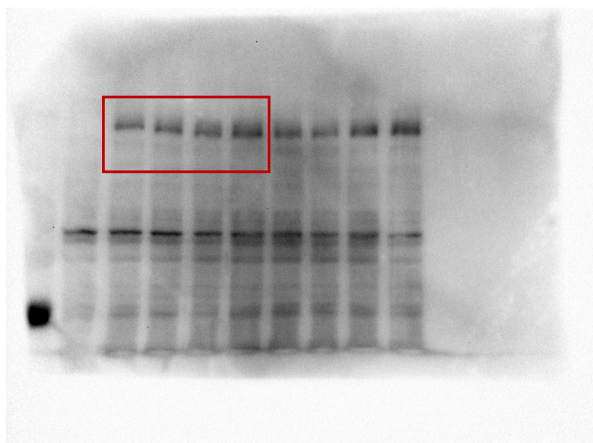

Red square marks the area shown in Figure 4 - figure supplement 2B ( $\alpha$ -HA blot top right).

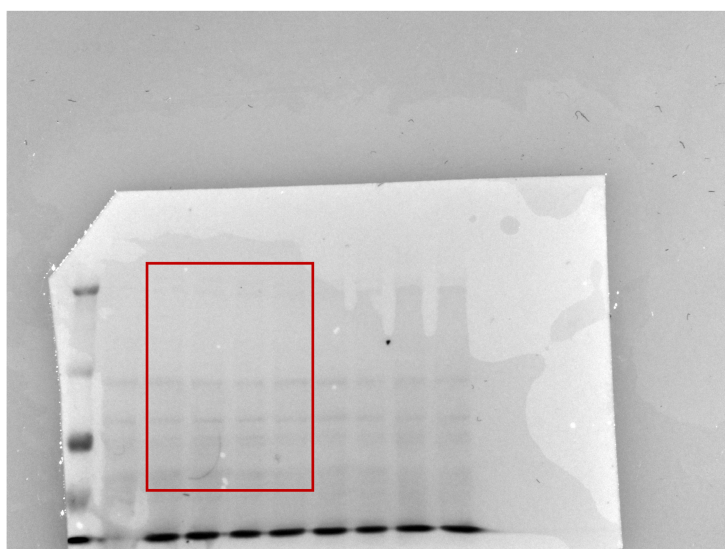

Red square marks the area shown in Figure 4 - figure supplement 2B (ponceau bottom right).

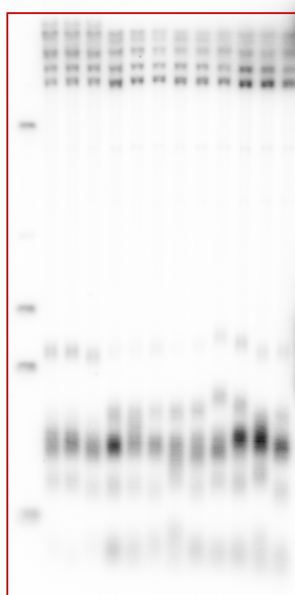

Red square marks the area shown in Figure 4 - figure supplement 2D.
