# Supplementary material for: Telomere length regulation by Rif1 protein from Hansenula polymorpha
Source: eLife journal article supplement (doi:10.7554/elife.75010), 2022-01-24
Supplement: fig5-figsupp2-data2 [file Fig. 5 - suppl. 2 labels.pdf › Figure 5 - figure supplement 2 - source data 2/Fig. 5 - suppl. 2 labels.pdf]

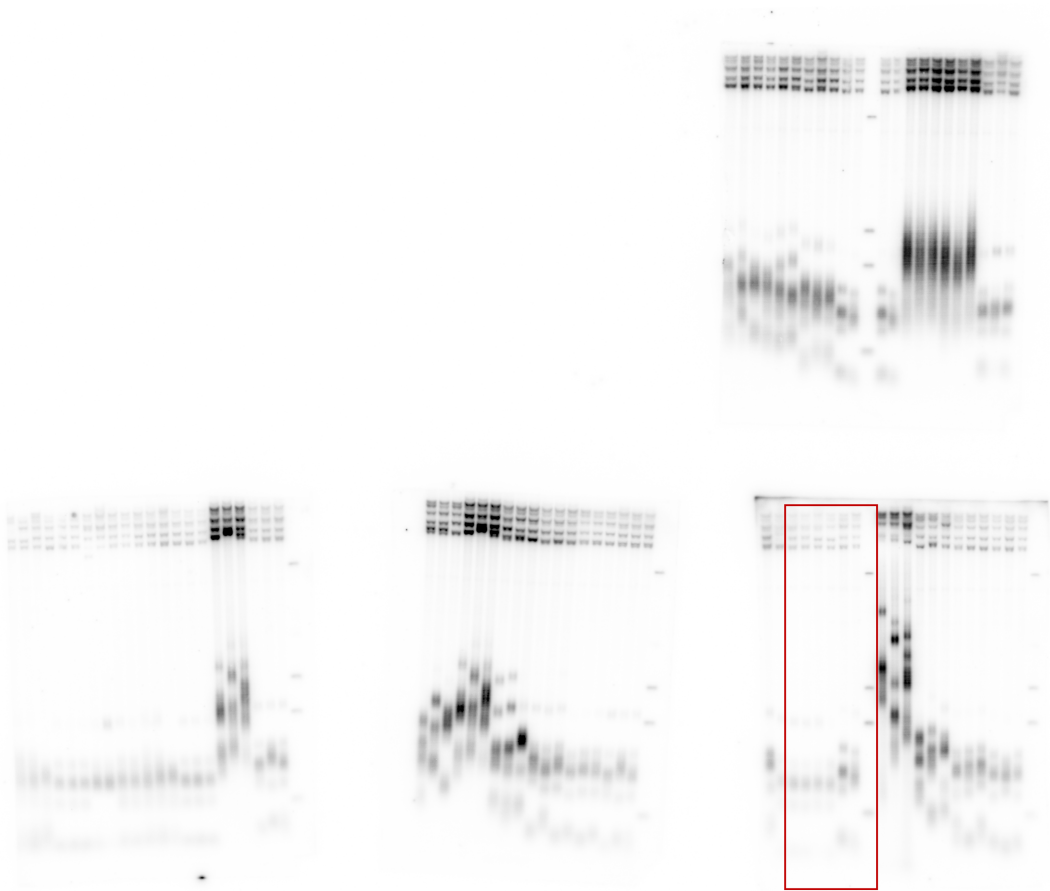

Red square marks the area shown in Figure 5 - figure supplement 2B.

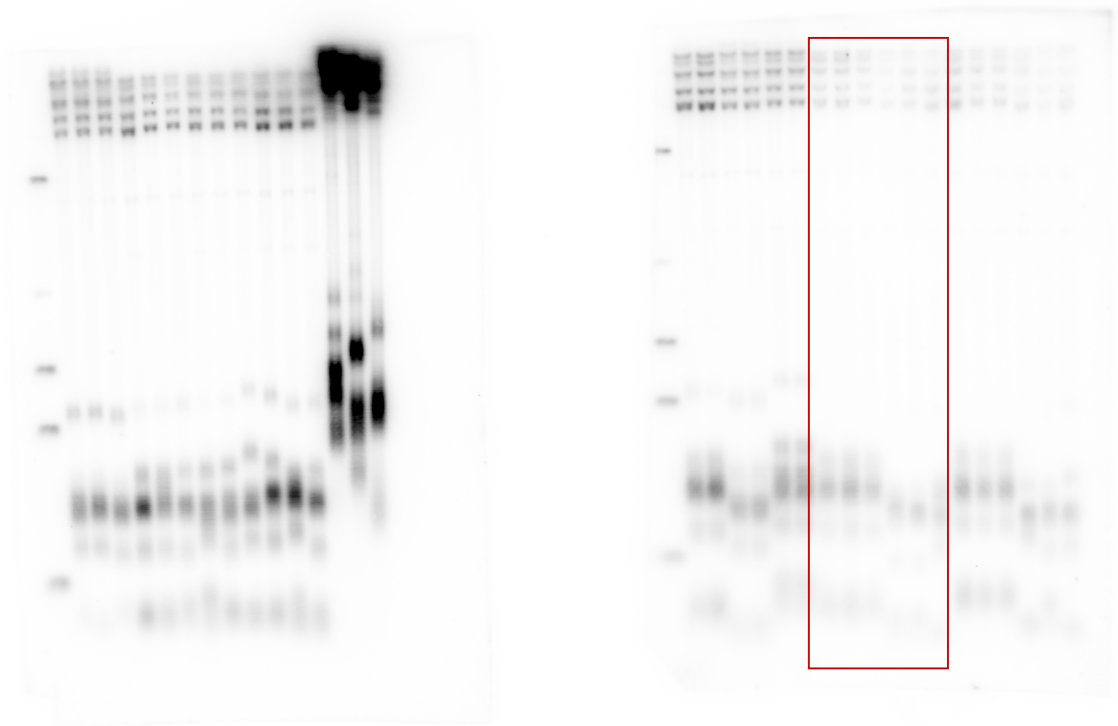

Red square marks the area shown in Figure 5 - figure supplement 2E (the raw unedited blot is in the Figure 5 - figure supplement 2 - source data 3 folder).
