# Supplementary material for: Telomere length regulation by Rif1 protein from Hansenula polymorpha
Source: eLife. 2022 Feb 7;11:e75010. doi: 10.7554/eLife.75010 (PMC8820739; doi:10.7554/eLife.75010)
Supplement: Figure 1—figure supplement 1—source data 1. [file elife-75010-fig1-figsupp1-data1.xlsx]

## Sheet: Fig. 1-fig. suppl. 1B
Figure 1 – figure supplement 1B. ChIP analysis
	"1% of input" samples										"1% of input" samples
		Rap1B-HA										Rap1B-HA
WSC3		intTEL0			intTEL18					TEL		intTEL0			intTEL18
		replicate 1	replicate 2	replicate 3	replicate 1	replicate 2	replicate 3					replicate 1	replicate 2	replicate 3	replicate 1	replicate 2	replicate 3
	Ct 1	22.1653	21.8002	21.6903	22.6649	23.289	22.9169				Ct 1	21.9141	21.4578	21.4723	21.7976	21.9706	21.7658
	Ct 2	22.2208	22.2289	22.2003	22.8753	23.3564	23.0286				Ct 2	21.7614	21.7845	21.2844	21.9019	21.965	21.7805
	Ct average	22.1931	22.0146	21.9453	22.7701	23.3227	22.9727				Ct average	21.8378	21.6212	21.3784	21.8497	21.9678	21.7731
	IP samples										IP samples
		Rap1B-HA										Rap1B-HA
		intTEL0			intTEL18							intTEL0			intTEL18
		replicate 1	replicate 2	replicate 3	replicate 1	replicate 2	replicate 3					replicate 1	replicate 2	replicate 3	replicate 1	replicate 2	replicate 3
	Ct 1	27.9601	25.8249	25.3578	21.2306	21.1525	21.0036				Ct 1	19.2531	19.3225	18.3595	19.217	19.4228	18.9146
	Ct 2	27.0193	26.0782	25.5698	21.4521	21.2929	21.3676				Ct 2	19.1868	19.3194	18.742	18.9667	18.9083	18.7996
	Ct average	27.4897	25.9515	25.4638	21.3414	21.2227	21.1856				Ct average	19.22	19.3209	18.5508	19.0919	19.1655	18.8571
	% of input	0.0254417	0.0652925	0.0872649	2.69208	4.28716	3.45127				% of input	6.13825	4.92535	7.09894	6.76403	6.97533	7.54739
	average	0.059333			3.47684						average	6.05418			7.09558
	SD	0.0313394			0.797845						SD	1.08923			0.405289
	"1% of input" samples										"1% of input" samples
		Rap1B-HA										Rap1B-HA
ALA1		intTEL0			intTEL18					RPS2		intTEL0			intTEL18
		replicate 1	replicate 2	replicate 3	replicate 1	replicate 2	replicate 3					replicate 1	replicate 2	replicate 3	replicate 1	replicate 2	replicate 3
	Ct 1	21.1037	20.4517	20.7259	21.3198	21.2125	21.0268				Ct 1	21.6471	21.4545	21.3426	21.6109	21.836	21.6264
	Ct 2	21.0738	20.6031	20.6451	21.0683	21.164	20.8725				Ct 2	21.5457	21.2132	21.3944	21.3445	21.5479	21.3384
	Ct average	21.0887	20.5274	20.6855	21.1941	21.1883	20.9496				Ct average	21.5964	21.3338	21.3685	21.4777	21.692	21.4824
	IP samples										IP samples
		Rap1B-HA										Rap1B-HA
		intTEL0			intTEL18							intTEL0			intTEL18
		replicate 1	replicate 2	replicate 3	replicate 1	replicate 2	replicate 3					replicate 1	replicate 2	replicate 3	replicate 1	replicate 2	replicate 3
	Ct 1	25.2961	25.7701	25.1431	25.0118	25.4997	25.6284				Ct 1	24.97	24.64	24.43	24.42	24.48	24.14
	Ct 2	25.4522	25.4063	25.0008	25.0879	25.3422	25.5396				Ct 2	24.4	24.38	23.75	24.32	24.15	24.08
	Ct average	25.3742	25.5882	25.072	25.0499	25.4209	25.584				Ct average	24.685	24.51	24.09	24.37	24.315	24.11
	% of input	0.0512815	0.0299607	0.0478131	0.0690709	0.0531911	0.0402638				% of input	0.117555	0.110631	0.151616	0.134686	0.162324	0.161811
	average	0.0430184			0.0541753						average	0.126601			0.15294
	SD	0.0114405			0.0144287						SD	0.0219387			0.0158108
Red values are plotted and depicted in the Figure 1 – figure supplement 1B.

## Sheet: Fig. 1-fig. suppl. 1C
Figure 1 – figure supplement 1C. ChIP analysis
	"1% of input" samples										"1% of input" samples
		Rif1-HA										Rif1-HA
WSC3		intTEL0			intTEL18					TEL		intTEL0			intTEL18
		replicate 1	replicate 2	replicate 3	replicate 1	replicate 2	replicate 3					replicate 1	replicate 2	replicate 3	replicate 1	replicate 2	replicate 3
	Ct 1	21.6492	21.9274	22.1885	22.7282	22.7288	22.6458				Ct 1	20.6474	20.7261	21.2973	21.9875	21.3244	21.5979
	Ct 2	21.7123	21.9458	22.0855	22.9956	22.7111	22.7162				Ct 2	20.6295	20.9373	20.9689	21.5758	22.4199	21.6224
	Ct average	21.6807	21.9366	22.137	22.8619	22.72	22.681				Ct average	20.6385	20.8317	21.1331	21.7817	21.8722	21.6101
	IP samples										IP samples
		Rif1-HA										Rif1-HA
		intTEL0			intTEL18							intTEL0			intTEL18
		replicate 1	replicate 2	replicate 3	replicate 1	replicate 2	replicate 3					replicate 1	replicate 2	replicate 3	replicate 1	replicate 2	replicate 3
	Ct 1	32.298	28.0883	29.783	27.7041	27.9857	28.1505				Ct 1	23.8948	23.3068	23.2852	23.7495	24.0305	24.313
	Ct 2	30.0549	27.9381	29.5228	27.6648	28.0861	27.9614				Ct 2	23.9182	23.3789	23.2367	23.5722	23.766	24.0949
	Ct average	31.1764	28.0132	29.6529	27.6845	28.0359	28.0559				Ct average	23.9065	23.3429	23.2609	23.6608	23.8982	24.204
	% of input	0.0013852	0.0148173	0.00546347	0.035338	0.0251046	0.0240978				% of input	0.103806	0.175416	0.228809	0.271847	0.245532	0.165646
	average	0.007222			0.0281801						average	0.169344			0.227675
	SD	0.00688657			0.00621933						SD	0.0627225			0.0553067
	"1% of input" samples										"1% of input" samples
		Rif1-HA										Rif1-HA
ALA1		intTEL0			intTEL18					RPS2		intTEL0			intTEL18
		replicate 1	replicate 2	replicate 3	replicate 1	replicate 2	replicate 3					replicate 1	replicate 2	replicate 3	replicate 1	replicate 2	replicate 3
	Ct 1	20.3856	20.3327	21.2535	20.9814	20.9463	21.0613				Ct 1	20.9957	21.2919	21.3273	21.5587	21.4765	21.4708
	Ct 2	20.7044	20.9203	21.103	21.2995	21.4579	21.1716				Ct 2	20.6747	20.6839	21.2795	21.363	21.3278	21.2947
	Ct average	20.545	20.6265	21.1783	21.1404	21.2021	21.1165				Ct average	20.8352	20.9879	21.3034	21.4608	21.4022	21.3828
	IP samples										IP samples
		Rif1-HA										Rif1-HA
		intTEL0			intTEL18							intTEL0			intTEL18
		replicate 1	replicate 2	replicate 3	replicate 1	replicate 2	replicate 3					replicate 1	replicate 2	replicate 3	replicate 1	replicate 2	replicate 3
	Ct 1	26.2691	25.3132	26.9732	26.8092	27.0479	26.2828				Ct 1	29.7485	27.1999	29.1722	28.7594	28.5088	28.7529
	Ct 2	26.2156	25.2885	27.0262	26.5162	27.1824	26.6613				Ct 2	29.3255	27.0429	28.8134	28.7001	28.8189	28.5851
	Ct average	26.2424	25.3009	26.9997	26.6627	27.1152	26.4721				Ct average	29.537	27.1214	28.9928	28.7297	28.6638	28.669
	% of input	0.0192722	0.0391637	0.0176836	0.0217583	0.0165957	0.0244233				% of input	0.00240162	0.0142441	0.00484469	0.00648391	0.00651654	0.0064067
	average	0.0253732			0.0209258						average	0.00716345			0.00646905
	SD	0.0119694			0.00397961						SD	0.00625247			5.64075e-05
Red values are plotted and depicted in the Figure 1 – figure supplement 1C.
