# Supplementary material for: Telomere length regulation by Rif1 protein from Hansenula polymorpha
Source: eLife. 2022 Feb 7;11:e75010. doi: 10.7554/eLife.75010 (PMC8820739; doi:10.7554/eLife.75010)
Supplement: Figure 1—source data 1. [file elife-75010-fig1-data1.xlsx]

## Sheet: Fig. 1D
Figure 1D. ChIP analysis
TEL	"1% of input" samples
		no tag			Rif1-HA			Rif1NTE1-264-HA			Rif1*-HA			Rif1∆NTE-HA
		replicate 1	replicate 2	replicate 3	replicate 1	replicate 2	replicate 3	replicate 1	replicate 2	replicate 3	replicate 1	replicate 2	replicate 3	replicate 1	replicate 2	replicate 3
	Ct 1	18.668	17.8734	18.08	17.9265	17.2094	17.3298	17.2815	17.4519	16.9545	18.0322	17.7507	17.5331	17.4739	17.3801	17.4525
	Ct 2	18.3915	18.0714	17.9145	17.6899	17.1734	16.8389	17.6586	17.3827	17.2046	17.6685	18.2236	17.5001	17.0896	17.8166	17.4809
	Ct average	18.5297	17.9724	17.9973	17.8082	17.1914	17.0844	17.4701	17.4173	17.0796	17.8504	17.9871	17.5166	17.2817	17.5983	17.4667
	IP samples
		no tag			Rif1-HA			Rif1NTE1-264-HA			Rif1*-HA			Rif1∆NTE-HA
		replicate 1	replicate 2	replicate 3	replicate 1	replicate 2	replicate 3	replicate 1	replicate 2	replicate 3	replicate 1	replicate 2	replicate 3	replicate 1	replicate 2	replicate 3
	Ct 1	26.2131	24.5847	24.6656	20.4394	20.3759	20.0688	19.6511	20.1724	20.0216	20.5692	20.763	20.1836	25.2477	24.0936	24.1048
	Ct 2	26.3915	24.5033	24.659	19.6986	20.6221	20.0948	18.9615	19.9103	20.1782	20.0573	20.4524	20.525	25.361	24.3382	24.3976
	Ct average	26.3023	24.544	24.6623	20.069	20.499	20.0818	19.3063	20.0414	20.0999	20.3132	20.6077	20.3543	25.3044	24.2159	24.2512
	% of input	0.00457324	0.0105137	0.00985441	0.208655	0.101001	0.125221	0.280048	0.162209	0.123249	0.181387	0.162603	0.13988	0.0038455	0.010184	0.00907117
	average	0.00831378			0.144959			0.188502			0.16129			0.00770023
	SD	0.00325613			0.0564761			0.0816392			0.0207844			0.00338435
	normalized average	0.0573527			1			1.30038			1.11266			0.0531201
	normalized SD	0.0224624			0.389601			0.563189			0.143381			0.023347
ALA1	"1% of input" samples
		no tag			Rif1-HA			Rif1NTE1-264-HA			Rif1*-HA			Rif1∆NTE-HA
		replicate 1	replicate 2	replicate 3	replicate 1	replicate 2	replicate 3	replicate 1	replicate 2	replicate 3	replicate 1	replicate 2	replicate 3	replicate 1	replicate 2	replicate 3
	Ct 1	18.0546	17.8522	17.7285	16.7231	16.537	16.2217	16.5603	16.666	16.4372	16.752	17.0761	16.6919	17.0829	16.6403	17.1248
	Ct 2	18.1048	18.2807	17.9658	16.5787	16.5133	16.5801	16.6823	17.6236	16.5709	16.563	17.1074	16.4375	17.1259	16.9358	17.1167
	Ct average	18.0797	18.0664	17.8471	16.6509	16.5252	16.4009	16.6213	17.1448	16.5041	16.6575	17.0918	16.5647	17.1044	16.7881	17.1207
	IP samples
		no tag			Rif1-HA			Rif1NTE1-264-HA			Rif1*-HA			Rif1∆NTE-HA
		replicate 1	replicate 2	replicate 3	replicate 1	replicate 2	replicate 3	replicate 1	replicate 2	replicate 3	replicate 1	replicate 2	replicate 3	replicate 1	replicate 2	replicate 3
	Ct 1	25.8896	23.4137	24.4838	25.3924	26.2029	25.8756	25.0299	24.0528	25.1901	24.7075	25.9688	24.9772	25.1802	23.5593	22.7778
	Ct 2	26.2252	23.5401	24.3834	26.0225	25.8941	25.3172	25.2494	23.8772	25.1812	24.7678	26.0326	25.0737	25.103	23.7378	22.8781
	Ct average	26.0574	23.4769	24.4336	25.7075	26.0485	25.5964	25.1397	23.965	25.1856	24.7376	26.0007	25.0255	25.1416	23.6485	22.828
	% of input	0.00396707	0.0235121	0.0104058	0.00187802	0.00135895	0.00170564	0.00272716	0.00884945	0.00243551	0.00369511	0.00208041	0.00283829	0.00380682	0.00860581	0.0191398
	average	0.0126283			0.00164754			0.00467071			0.00287127			0.0105175
	SD	0.00996024			0.00026437			0.00362183			0.000807852			0.00784322
	normalized average	0.0871165			0.0113655			0.0322209			0.0198075			0.072555
	normalized SD	0.0687108			0.00182376			0.0249853			0.00557298			0.0541065
Red values are plotted and depicted in the Figure 1D.
