# Supplementary material for: Telomere length regulation by Rif1 protein from Hansenula polymorpha
Source: eLife. 2022 Feb 7;11:e75010. doi: 10.7554/eLife.75010 (PMC8820739; doi:10.7554/eLife.75010)
Supplement: Figure 1—source data 2. [file elife-75010-fig1-data2.zip]

Archive with 13 entries (10 files):
- Figure 1 - source data 2/
- Figure 1 - source data 2/.DS_Store
- __MACOSX/
- __MACOSX/Figure 1 - source data 2/
- __MACOSX/Figure 1 - source data 2/._.DS_Store
- Figure 1 - source data 2/Fig. 1 labels.pdf
- __MACOSX/Figure 1 - source data 2/._Fig. 1 labels.pdf
- Figure 1 - source data 2/Fig. 1B.tif
- __MACOSX/Figure 1 - source data 2/._Fig. 1B.tif
- Figure 1 - source data 2/Fig. 1F (HA blot).tif
- __MACOSX/Figure 1 - source data 2/._Fig. 1F (HA blot).tif
- Figure 1 - source data 2/Fig. 1F (ponceau).tif
- __MACOSX/Figure 1 - source data 2/._Fig. 1F (ponceau).tif
