# Supplementary material for: Telomere length regulation by Rif1 protein from Hansenula polymorpha
Source: eLife. 2022 Feb 7;11:e75010. doi: 10.7554/eLife.75010 (PMC8820739; doi:10.7554/eLife.75010)
Supplement: Figure 3—source data 1. [file elife-75010-fig3-data1.xlsx]

## Sheet: Fig. 3D
Figure 3D. Quantification of the titration EMSA experiment.
	Fraction DNA bound
protein concentration, nM	Tel4(G) (replicate 1)	Tel4(G) (replicate 2)	Tel4(GC) (replicate 1)	Tel4(GC) (replicate 2)
10000	0.949864	0.911221	0.918151	0.912482
3000	0.912941	0.911009	0.851855	0.818663
1000	0.821561	0.848987	0.734344	0.696398
300	0.537613	0.61252	0.319717	0.339464
100	0.101498	0.0532516	-0.00248387	0.00949473
30	0.0156399	-0.00553141	-0.0050977	-0.0310772
10	-0.00212035	0.000612853	0.00249529	-0.0251001
3	0.00959285	0.0116967	0.0273748	-0.0137019
1	0.0092942	-0.00593893	0.0137719	0.00210562

## Sheet: Fig. 3E
Figure 3E. Quantification of the competition EMSA experiment.
	Fraction DNA bound
competitor DNA concentration	Tel4(G)	Tel4(C)	Tel4(GC)	ssrnd1	ssrnd2	ssrnd3	dsrnd1	dsrnd2
30	0.137972	0.107981	0.131554	0.224169	0.216306	0.393711	0.276171	0.19845
10	0.109129	0.142063	0.213303	0.422998	0.397754	0.608878	0.371344	0.223201
3	0.224016	0.200666	0.304187	0.647477	0.65173	0.803538	0.533781	0.364506
1	0.452359	0.370565	0.374462	0.755071	0.789796	0.849964	0.662867	0.506283
0.3	0.729044	0.627918	0.614279	0.872976	0.846754	0.899823	0.782463	0.731054
0.1	0.816885	0.827179	0.791186	0.908279	0.855185	0.895447	0.85802
