# Supplementary material for: Telomere length regulation by Rif1 protein from Hansenula polymorpha
Source: eLife. 2022 Feb 7;11:e75010. doi: 10.7554/eLife.75010 (PMC8820739; doi:10.7554/eLife.75010)
Supplement: Figure 4—figure supplement 2—source data 1. [file elife-75010-fig4-figsupp2-data1.xlsx]

## Sheet: Fig. 4-fig. suppl. 2C
Figure 4 - figure supplement 2C. ChIP analysis
	"1% of input" samples
TEL		Rif1-HA
		WT			K504E/R539E
		replicate 1	replicate 2	replicate 3	replicate 1	replicate 2	replicate 3
	Ct 1	20.8616	20.8424	21.2571	21.3164	21.3543	22.0912
	Ct 2	20.8835	20.9623	21.1624	21.2347	21.343	21.3502
	Ct average	20.8725	20.9023	21.2097	21.2755	21.3486	21.7207
	IP samples
		Rif1-HA
		WT			K504E/R539E
		replicate 1	replicate 2	replicate 3	replicate 1	replicate 2	replicate 3
	Ct 1	23.9575	23.5664	24.3747	23.7789	24.0502	24.8109
	Ct 2	24.2512	23.2945	24.4907	23.6389	23.6301	25.0445
	Ct average	24.1043	23.4304	24.4327	23.7089	23.8402	24.9277
	% of input	0.106449	0.173366	0.107101	0.185129	0.177813	0.108293
	average	0.128972			0.157078
	SD	0.0384478			0.0424074
	normalized average	1			1.21793
	normalized SD	0.29811			0.328812
	"1% of input" samples
ALA1		Rif1-HA
		WT			K504E/R539E
		replicate 1	replicate 2	replicate 3	replicate 1	replicate 2	replicate 3
	Ct 1	20.6516	20.7462	20.7508	20.9885	21.0451	21.0554
	Ct 2	20.6288	20.9591	21.0065	21.0387	21.3117	21.1162
	Ct average	20.6402	20.8527	20.8786	21.0136	21.1784	21.0858
	IP samples
		Rif1-HA
		WT			K504E/R539E
		replicate 1	replicate 2	replicate 3	replicate 1	replicate 2	replicate 3
	Ct 1	26.4303	26.4143	27.4842	26.5967	26.7398	26.4215
	Ct 2	26.6233	26.7097	27.5505	26.755	26.6568	26.3379
	Ct average	26.5268	26.562	27.5174	26.6758	26.6983	26.3797
	% of input	0.016902	0.0191124	0.0100354	0.0197467	0.0217951	0.0254908
	average	0.0153499			0.0223442
	SD	0.0047334			0.00291112
	normalized average	0.119018			0.173249
	normalized SD	0.0367011			0.0225718
Red values are plotted and depicted in the Figure 4 - figure supplement 2C.
