# Supplementary material for: Telomere length regulation by Rif1 protein from Hansenula polymorpha
Source: eLife. 2022 Feb 7;11:e75010. doi: 10.7554/eLife.75010 (PMC8820739; doi:10.7554/eLife.75010)
Supplement: Figure 4—source data 1. [file elife-75010-fig4-data1.xlsx]

## Sheet: Fig. 4D
Figure 4D. ChIP analysis
	"1% of input" samples														IP samples
		Rif1*-HA			4A1 Rif1*-HA			4A2 Rif1*-HA			8A Rif1*-HA					Rif1*-HA			4A1 Rif1*-HA			4A2 Rif1*-HA			8A Rif1*-HA
		replicate 1	replicate 2	replicate 3	replicate 1	replicate 2	replicate 3	replicate 1	replicate 2	replicate 3	replicate 1	replicate 2	replicate 3			replicate 1	replicate 2	replicate 3	replicate 1	replicate 2	replicate 3	replicate 1	replicate 2	replicate 3	replicate 1	replicate 2	replicate 3
TEL	Ct 1	17.7443	17.564	17.531	17.2895	17.5534	17.0669	18.2436	17.1662	16.8925	17.6161	17.9031	18.1475		Ct 1	20.2585	19.7955	19.1981	25.9196	25.5734	24.5485	26.1607	25.0453	24.6521	25.0426	26.0467	23.1232
	Ct 2	17.4706	17.5399	17.3771	17.3138	17.5754	17.2712	18.0724	17.1852	17.1998	17.6256	17.6463	17.4683		Ct 2	20.5254	20.1353	19.2295	25.8266	25.5716	25.2531	25.6507	25.3846	25.098	25.4017	24.8164	22.6017
	Ct average	17.6074	17.5519	17.454	17.3016	17.5644	17.169	18.158	17.1757	17.0461	17.6208	17.7747	17.8079		Ct average	20.3919	19.9654	19.2138	25.8731	25.5725	24.9008	25.9057	25.2149	24.875	25.2221	25.4316	22.8625
															% of input	0.145139	0.187708	0.295298	0.00262866	0.00388454	0.00470437	0.00465281	0.00380141	0.0043981	0.00514974	0.0049551	0.0300902
															average	0.209382			0.00373919			0.00428411			0.0133983
															SD	0.0773901			0.00104546			0.000436999			0.0144559
															normalized average	1			0.0178582			0.0204607			0.06399
															normalized SD	0.369612			0.00499309			0.00208709			0.0690408
	"1% of input" samples														IP samples
		Rif1*-HA			4A1 Rif1*-HA			4A2 Rif1*-HA			8A Rif1*-HA					Rif1*-HA			4A1 Rif1*-HA			4A2 Rif1*-HA			8A Rif1*-HA
		replicate 1	replicate 2	replicate 3	replicate 1	replicate 2	replicate 3	replicate 1	replicate 2	replicate 3	replicate 1	replicate 2	replicate 3			replicate 1	replicate 2	replicate 3	replicate 1	replicate 2	replicate 3	replicate 1	replicate 2	replicate 3	replicate 1	replicate 2	replicate 3
ALA1	Ct 1	17.2339	17.4124	17.3556	16.6542	17.1379	16.8639	18.0253	16.9532	16.8057	17.4081	17.0525	17.1662		Ct 1	23.8418	24.8598	24.2164	25.2572	22.8976	24.3149	25.0303	25.26	24.9059	24.5045	25.061	22.2966
	Ct 2	17.3018	17.2188	16.8525	16.8503	17.2257	16.6557	18.1805	17.0546	16.9555	17.0756	17.07	17.1006		Ct 2	23.6703	25.1108	24.3645	25.2651	24.7316	24.1469	25.3003	25.1795	24.5298	24.5065	24.9753	22.356
	Ct average	17.2679	17.3156	17.1041	16.7522	17.1818	16.7598	18.1029	17.0039	16.8806	17.2418	17.0613	17.1334		Ct average	23.7561	24.9853	24.2904	25.2611	23.8146	24.2309	25.1653	25.2197	24.7179	24.5055	25.0181	22.3263
															% of input	0.0111393	0.00491123	0.00686588	0.00274511	0.0100767	0.00563607	0.00748183	0.00336342	0.00437277	0.00650774	0.00402472	0.0273394
															average	0.00763882			0.00615262			0.00507267			0.0126239
															SD	0.00318518			0.00369298			0.00214656			0.0128043
															normalized average	0.0364827			0.0293847			0.0242269			0.0602915
															normalized SD	0.0152123			0.0176375			0.0102519			0.0611527
															Red values are plotted and depicted in the Figure 4D.
