# Supplementary material for: Telomere length regulation by Rif1 protein from Hansenula polymorpha
Source: eLife. 2022 Feb 7;11:e75010. doi: 10.7554/eLife.75010 (PMC8820739; doi:10.7554/eLife.75010)
Supplement: Figure 5—figure supplement 2—source data 1. [file elife-75010-fig5-figsupp2-data1.xlsx]

## Sheet: Fig. 5-fig. suppl. 2A
Figure 5 – figure supplement 2A. ChIP analysis
	"1% of input" samples
TEL		no tag			Ku70-HA			Ku80-HA
		replicate 1	replicate 2	replicate 3	replicate 1	replicate 2	replicate 3	replicate 1	replicate 2	replicate 3
	Ct 1	16.83	17.07	16.65	16.67	16.81	16.72	17.0736	17.5006	17.6827
	Ct 2	16.94	16.65	16.37	16.42	16.05	16.56	16.6311	17.0122	17.2009
	Ct average	16.885	16.86	16.51	16.545	16.43	16.64	16.8523	17.2564	17.4418
	IP samples
		no tag			Ku70-HA			Ku80-HA
		replicate 1	replicate 2	replicate 3	replicate 1	replicate 2	replicate 3	replicate 1	replicate 2	replicate 3
	Ct 1	27.21	27.13	24.99	15.61	15.17	15.36	17.3607	17.3239	17.502
	Ct 2	26.68	26.24	25.09	15.54	15.28	15.48	17.0809	17.3708	17.8886
	Ct average	26.945	26.685	25.04	15.575	15.225	15.42	17.2208	17.3474	17.6953
	% of input	0.000936781	0.0011025	0.00270529	1.95884	2.30537	2.32947	0.774603	0.938899	0.838853
	average	0.00158153			2.19789			0.850785
	SD	0.000976731			0.207376			0.0827957
	"1% of input" samples
ALA1		no tag			Ku70-HA			Ku80-HA
		replicate 1	replicate 2	replicate 3	replicate 1	replicate 2	replicate 3	replicate 1	replicate 2	replicate 3
	Ct 1	17.24	17.36	17.12	17.09	17.41	17.21	16.3513	16.2507	16.6939
	Ct 2	17.41	18.33	17.07	17.11	16.43	17.35	16.3443	16.3636	16.5259
	Ct average	17.325	17.845	17.095	17.1	16.92	17.28	16.3478	16.3072	16.6099
	IP samples
		no tag			Ku70-HA			Ku80-HA
		replicate 1	replicate 2	replicate 3	replicate 1	replicate 2	replicate 3	replicate 1	replicate 2	replicate 3
	Ct 1	27.31	27.33	25.32	25.03	23.42	25.24	23.9033	23.6037	22.3695
	Ct 2	27.71	27.29	25.97	25.21	23.75	25.08	23.7378	24.0148	22.4243
	Ct average	27.51	27.31	25.645	25.12	23.585	25.16	23.8206	23.8092	22.3969
	% of input	0.000859032	0.00141498	0.00266805	0.00385247	0.00985451	0.00424506	0.00562948	0.00551641	0.0181105
	average	0.00164735			0.00598401			0.00975214
	SD	0.000926624			0.00335769			0.0072388
Red values are plotted and depicted in the Figure 5 – figure supplement 2A.

## Sheet: Fig. 5-fig. suppl. 2C
Figure 5 – figure supplement 2C. ChIP analysis
	"1% of input" samples
		Ku80-HA
TEL		RIF1			∆rif1
		replicate 1	replicate 2	replicate 3	replicate 1	replicate 2	replicate 3
	Ct 1	17.0736	17.5006	17.6827	17.3786	17.0663	17.1539
	Ct 2	16.6311	17.0122	17.2009	16.8988	17.0019	17.568
	Ct average	16.8523	17.2564	17.4418	17.1387	17.0341	17.3609
	IP samples
		Ku80-HA
		RIF1			∆rif1
		replicate 1	replicate 2	replicate 3	replicate 1	replicate 2	replicate 3
	Ct 1	17.3607	17.3239	17.502	18.0862	18.4542	20.8726
	Ct 2	17.0809	17.3708	17.8886	18.2692	18.6795	18.1894
	Ct average	17.2208	17.3474	17.6953	18.1777	18.5669	19.531
	% of input	0.774603	0.938899	0.838853	0.48666	0.345617	0.222198
	average	0.850785			0.351492
	SD	0.0827957			0.132329
	normalized average	1			0.413138
	normalized SD	0.0973168			0.155538
	"1% of input" samples
		Ku80-HA
ALA1		RIF1			∆rif1
		replicate 1	replicate 2	replicate 3	replicate 1	replicate 2	replicate 3
	Ct 1	16.3513	16.2507	16.6939	16.1735	16.406	16.3671
	Ct 2	16.3443	16.3636	16.5259	16.2652	16.396	16.5713
	Ct average	16.3478	16.3072	16.6099	16.2193	16.401	16.4692
	IP samples
		Ku80-HA
		RIF1			∆rif1
		replicate 1	replicate 2	replicate 3	replicate 1	replicate 2	replicate 3
	Ct 1	23.9033	23.6037	22.3695	24.1004	22.6146	23.6704
	Ct 2	23.7378	24.0148	22.4243	24.1468		23.7694
	Ct average	23.8206	23.8092	22.3969	24.1236	22.6146	23.7199
	% of input	0.00562948	0.00551641	0.0181105	0.0041742	0.0134748	0.00656631
	average	0.00975214			0.00807177
	SD	0.0072388			0.00482961
	normalized average	0.0114625			0.00948744
	normalized SD	0.00850838			0.00567665
Red values are plotted and depicted in the Figure 5 – figure supplement 2C.

## Sheet: Fig. 5-fig. suppl. 2D
Figure 5 – figure supplement 2D. ChIP analysis
	"1% of input" samples
		Rif1-HA
TEL		TER			∆ter
		replicate 1	replicate 2	replicate 3	replicate 1	replicate 2	replicate 3
	Ct 1	19.2863	18.6532	19.2248	19.0015	18.6377	18.5432
	Ct 2	19.2787	18.7475	19.4936	19.4594	18.8744	18.9783
	Ct average	19.2825	18.7004	19.3592	19.2304	18.756	18.7608
	IP samples
		Rif1-HA
		TER			∆ter
		replicate 1	replicate 2	replicate 3	replicate 1	replicate 2	replicate 3
	Ct 1	21.652	21.183	21.8879	22.4234	23.0292	22.0584
	Ct 2	21.7299	21.2019	21.7323	22.3532	22.2777	22.4484
	Ct average	21.6909	21.1924	21.8101	22.3883	22.6534	22.2534
	% of input	0.188361	0.177749	0.182902	0.112045	0.067106	0.0888388
	average	0.183004			0.0893298
	SD	0.00530658			0.0224733
	normalized average	1			0.488131
	normalized SD	0.0289971			0.122802
	"1% of input" samples
		Rif1-HA
ALA1		TER			∆ter
		replicate 1	replicate 2	replicate 3	replicate 1	replicate 2	replicate 3
	Ct 1	18.1873	17.6333	18.4097	18.9682	18.8358	18.4451
	Ct 2	18.0194	17.6881	18.4949	19.1185	18.7325	18.7288
	Ct average	18.1033	17.6607	18.4523	19.0433	18.7841	18.587
	IP samples
		Rif1-HA
		TER			∆ter
		replicate 1	replicate 2	replicate 3	replicate 1	replicate 2	replicate 3
	Ct 1	26.8513	26.2707	27.3722	26.4492	27.2787	27.0845
	Ct 2	26.5199	26.0497	27.1789	25.9738	27.0461	26.7224
	Ct average	26.6856	26.1602	27.2755	26.2115	27.1624	26.9034
	% of input	0.002609	0.0027631	0.00220772	0.00695291	0.00300536	0.00313689
	average	0.00252661			0.00436505
	SD	0.000286711			0.00224211
	normalized average	0.0138063			0.0238523
	normalized SD	0.00156669			0.0122517
Red values are plotted and depicted in the Figure 5 – figure supplement 2D.

## Sheet: Fig. 5-fig. suppl. 2F
Figure 5 – figure supplement 2F. RNA Co-IP
	"0.3% of input" samples
HpTER		no tag			Ku80-HA			TERT-HA
		replicate 1	replicate 2	replicate 3	replicate 1	replicate 2	replicate 3	replicate 1	replicate 2
	Ct 1	18.1222	17.6202	17.4671	16.9091	17.0511	17.2801	17.5183	17.0939
	Ct 2	17.118	17.0111	17.2333	16.5003	16.6419	16.4693	17.1283	17.0579
	Ct average	17.6201	17.3157	17.3502	16.7047	16.8465	16.8747	17.3233	17.0759
	IP samples
		no tag			Ku80-HA			TERT-HA
		replicate 1	replicate 2	replicate 3	replicate 1	replicate 2	replicate 3	replicate 1	replicate 2
	Ct 1	21.9756	21.7465	22.105	22.7288	21.9985	22.0584	14.3161	14.7098
	Ct 2	22.004	21.891	22.2133	22.1242	21.6719	22.0133	14.2536	14.6518
	Ct average	21.9898	21.8188	22.1592	22.4265	21.8352	22.0359	14.2849	14.6808
	% of input	0.0145117	0.0132295	0.0107026	0.0056845	0.00944916	0.00838414	2.4648	1.57804
	average	0.0128146			0.00783927			2.02142
	SD	0.00193816			0.00194058			0.627033
	"0.3% of input" samples
HpU1		no tag			Ku80-HA			TERT-HA
		replicate 1	replicate 2	replicate 3	replicate 1	replicate 2	replicate 3	replicate 1	replicate 2
	Ct 1	17.9338	17.8671	18.1211	18.2836	18.5557	18.9536	17.8937	17.6077
	Ct 2	18.0202	17.9712	18.1553	18.3651	18.3716	18.328	17.8241	17.4294
	Ct average	17.977	17.9192	18.1382	18.3244	18.4636	18.6408	17.8589	17.5186
	IP samples
		no tag			Ku80-HA			TERT-HA
		replicate 1	replicate 2	replicate 3	replicate 1	replicate 2	replicate 3	replicate 1	replicate 2
	Ct 1	25.3007	23.2417	25.1449	26.9998	24.6883	24.9858	25.4828	26.4101
	Ct 2	25.5253	23.2387	25.2202	27.2631	24.7358	25.1253	25.9274	27.0253
	Ct average	25.413	23.2402	25.1826	27.1314	24.7121	25.0556	25.7051	26.7177
	% of input	0.00173251	0.00750465	0.00227275	0.000669771	0.00394598	0.00351627	0.00130371	0.000510394
	average	0.00383664			0.00271067			0.000907053
	SD	0.00318806			0.00178048			0.00056096
Red values are plotted and depicted in the Figure 5 – figure supplement 2F.
