# Supplementary material for: Telomere length regulation by Rif1 protein from Hansenula polymorpha
Source: eLife. 2022 Feb 7;11:e75010. doi: 10.7554/eLife.75010 (PMC8820739; doi:10.7554/eLife.75010)
Supplement: Figure 5—source data 1. [file elife-75010-fig5-data1.xlsx]

## Sheet: Fig. 5E
Figure 5E. ChIP analysis
TEL	"1% of input" samples
		Rif1-HA			Rif1-HA∆ku80			Rif1-HA			Rif1-HA∆ku70
		replicate 1	replicate 2	replicate 3	replicate 1	replicate 2	replicate 3	replicate 1	replicate 2	replicate 3	replicate 1	replicate 2	replicate 3
	Ct 1	17.7843	17.7031	18.3005	16.8249	16.8234	17.1959	17.53	17.38	17.2	15.92	16.54	16.33
	Ct 2	17.5645	17.6667	17.9442	16.7073	16.83	17.2037	17.22	17.51	16.75	16.04	16.18	16.24
	Ct average	17.6744	17.6849	18.1223	16.7661	16.8267	17.1998	17.375	17.445	16.975	15.98	16.36	16.285
	IP samples
		Rif1-HA			Rif1-HA∆ku80			Rif1-HA			Rif1-HA∆ku70
		replicate 1	replicate 2	replicate 3	replicate 1	replicate 2	replicate 3	replicate 1	replicate 2	replicate 3	replicate 1	replicate 2	replicate 3
	Ct 1	19.248	18.9157	19.6663	20.3818	20.4501	21.1526	19.33	19.61	19.41	20.27	20.24	20.53
	Ct 2	19.1186	19.0796	19.9481	20.5949	20.4594	21.4008	19.41	19.5	19.51	20.55	20.34	20.61
	Ct average	19.1833	18.9977	19.8072	20.4883	20.4548	21.2767	19.37	19.555	19.46	20.41	20.29	20.57
	% of input	0.351385	0.402544	0.311029	0.0757687	0.0808788	0.0592579	0.250868	0.231647	0.178624	0.0463914	0.0656073	0.0512964
	average	0.354986			0.0719685			0.22038			0.0544317
	SD	0.0458635			0.0113003			0.0374166			0.00998427
	normalized average	1			0.202736			1			0.24699
	normalized SD	0.129198			0.0318332			0.169782			0.0453048
ALA1	"1% of input" samples
		Rif1-HA			Rif1-HA∆ku80			Rif1-HA			Rif1-HA∆ku70
		replicate 1	replicate 2	replicate 3	replicate 1	replicate 2	replicate 3	replicate 1	replicate 2	replicate 3	replicate 1	replicate 2	replicate 3
	Ct 1	17.0562	17.2582	17.8774	17.3191	17.3538	17.4695	16.98	16.59	16.72	16.53	16.73	17.07
	Ct 2	17.1022	17.1423	17.5414	17.3467	17.2541	17.6705	16.73	17.14	17.19	16.87	16.78	17.17
	Ct average	17.0792	17.2003	17.7094	17.3329	17.3039	17.57	16.855	16.865	16.955	16.7	16.755	17.12
	IP samples
		Rif1-HA			Rif1-HA∆ku80			Rif1-HA			Rif1-HA∆ku70
		replicate 1	replicate 2	replicate 3	replicate 1	replicate 2	replicate 3	replicate 1	replicate 2	replicate 3	replicate 1	replicate 2	replicate 3
	Ct 1	25.2013	23.9568	24.8422	25.4924	25.1603	25.0714	25.06	25.23	25.2	25.24	25.39	24.89
	Ct 2	24.9401	23.505	25.1041	25.2636	25.3258	25.0746	25.78	25.42	25.74	25.57	25.87	25.28
	Ct average	25.0707	23.7309	24.9732	25.378	25.2431	25.073	25.42	25.325	25.47	25.405	25.63	25.085
	% of input	0.00392935	0.0108165	0.00650728	0.00378597	0.00407456	0.00551291	0.00264045	0.00283979	0.00273357	0.00239626	0.0021299	0.00400218
	average	0.00708436			0.00445781			0.00273794			0.00284278
	SD	0.00347963			0.000925067			9.97414e-05			0.00101286
	normalized average	0.0199567			0.0125577			0.0124237			0.0128995
	normalized SD	0.00980218			0.00260593			0.000452589			0.00459598
Red values are plotted and depicted in the Figure 5E.

## Sheet: Fig. 5F
Figure 5F. ChIP analysis
	"1% of input" samples
TEL		Rif1NTE1-264-HA
		WT			F225E			R230E
		replicate 1	replicate 2	replicate 3	replicate 1	replicate 2	replicate 3	replicate 1	replicate 2	replicate 3
	Ct 1	17.3656	17.4045	17.2889	17.1386	17.0992	17.425	17.2188	17.3547
	Ct 2	17.1644	17.2524	17.2538	17.453	16.9694	17.3567	16.9234	17.1046	17.8198
	Ct average	17.265	17.3285	17.2713	17.2958	17.0343	17.3909	17.0711	17.2297	17.8198
	IP samples
		Rif1NTE1-264-HA
		WT			F225E			R230E
		replicate 1	replicate 2	replicate 3	replicate 1	replicate 2	replicate 3	replicate 1	replicate 2	replicate 3
	Ct 1	20.5303	20.8523	20.7567	23.7983	23.9719	24.1041	23.6188	23.679	24.5011
	Ct 2	20.5298	20.9187	20.9099	23.59	23.7901	23.2797	23.9462	23.8737	24.5164
	Ct average	20.5301	20.8855	20.8333	23.6941	23.881	23.6919	23.7825	23.7764	24.5087
	% of input	0.10402	0.0849624	0.0846739	0.0118552	0.00868816	0.0126825	0.00954274	0.0106966	0.00969262
	average	0.0912187			0.0110753			0.00997732
	SD	0.011087			0.0021083			0.000627412
	normalized average	1			0.121415			0.109378
	normalized SD	0.121543			0.0231125			0.00687811
	"1% of input" samples
ALA1		Rif1NTE1-264-HA
		WT			F225E			R230E
		replicate 1	replicate 2	replicate 3	replicate 1	replicate 2	replicate 3	replicate 1	replicate 2	replicate 3
	Ct 1	17.0122	17.3158	16.8663	17.4346	17.0218	17.1437	17.0029	17.1291	17.4405
	Ct 2	17.2122	17.1545	17.1108	17.1819	17.0006	17.0192	17.2139	17.2239	17.4602
	Ct average	17.1122	17.2351	16.9885	17.3083	17.0112	17.0814	17.1084	17.1765	17.4504
	IP samples
		Rif1NTE1-264-HA
		WT			F225E			R230E
		replicate 1	replicate 2	replicate 3	replicate 1	replicate 2	replicate 3	replicate 1	replicate 2	replicate 3
	Ct 1	24.4275	24.8737	24.2045	24.2864	24.1506	23.504	24.3418	24.0113	24.6482
	Ct 2	24.4325	24.8873	24.364	24.4561	24.3052	23.4229	24.4748	24.0264	24.9476
	Ct average	24.43	24.8805	24.2843	24.3713	24.2279	23.4634	24.4083	24.0189	24.7979
	% of input	0.00626812	0.00499466	0.00636457	0.00747856	0.00672292	0.0119903	0.00634584	0.00871441	0.00614005
	average	0.00587578			0.00873058			0.00706676
	SD	0.000764594			0.00284814			0.00143061
	normalized average	0.0644142			0.0957104			0.0774706
	normalized SD	0.00838199			0.0312232			0.0156833
Red values are plotted and depicted in the Figure 5F.

## Sheet: Fig. 5H
Figure 5H. ChIP analysis
	"1% of input" samples
TEL		Rif1*-HA
		WT			F225E			R230E			WT			6A			F225E/R230E
		replicate 1	replicate 2	replicate 3	replicate 1	replicate 2	replicate 3	replicate 1	replicate 2	replicate 3	replicate 1	replicate 2	replicate 3	replicate 1	replicate 2	replicate 3	replicate 1	replicate 2	replicate 3
	Ct 1	18.0614	18.1088	18.9304	17.7981	18.5052	18.5701	18.2092	18.417	18.5036	17.832	18.0019	18.0938	17.7235	18.2102	18.9158	17.8354	17.8602	17.6757
	Ct 2	18.0067	17.9732	18.0214	18.2012			18.3596	18.1337	18.7738	17.7197	18.025	17.5705	17.6005	18.3303	18.0087	17.9979	17.825	17.4004
	Ct average	18.0341	18.041	18.4759	17.9996	18.5052	18.5701	18.2844	18.2754	18.6387	17.7759	18.0134	17.8321	17.662	18.2702	18.4623	17.9167	17.8426	17.538
	IP samples
		Rif1*-HA
		WT			F225E			R230E			WT			6A			F225E/R230E
		replicate 1	replicate 2	replicate 3	replicate 1	replicate 2	replicate 3	replicate 1	replicate 2	replicate 3	replicate 1	replicate 2	replicate 3	replicate 1	replicate 2	replicate 3	replicate 1	replicate 2	replicate 3
	Ct 1	19.6925	19.4367	20.2061	19.7249	19.9755	20.8275	19.3044	20.0432	20.6712	20.5484	20.1595	19.8184	20.452	20.7341	20.6803	20.7336	20.5154	20.1886
	Ct 2	19.4225	19.6046	20.0987	19.7193	19.7998	20.4979	19.5914	20.5667	20.0283	20.7588	20.2482	20.0306	20.3913	21.0557	20.435	20.7244	20.7944	20.3553
	Ct average	19.5575	19.5207	20.1524	19.7221	19.8877	20.6627	19.4479	20.3049	20.3497	20.6536	20.2039	19.9245	20.4216	20.8949	20.5577	20.729	20.6549	20.2719
	% of input	0.347857	0.358579	0.312846	0.303028	0.383563	0.234458	0.446432	0.244926	0.305442	0.136055	0.219087	0.234502	0.147663	0.162145	0.233999	0.142363	0.14237	0.150321
	average	0.33976			0.307016			0.332267			0.196548			0.181269			0.145018
	SD	0.023917			0.0746323			0.103397			0.0529525			0.0462361			0.00459225
	normalized average	1			0.903626			0.977945			1			0.922264			0.737827
	normalized SD	0.0703938			0.219661			0.304322			0.269413			0.235241			0.0233646
	"1% of input" samples
ALA1		Rif1*-HA
		WT			F225E			R230E			WT			6A			F225E/R230E
		replicate 1	replicate 2	replicate 3	replicate 1	replicate 2	replicate 3	replicate 1	replicate 2	replicate 3	replicate 1	replicate 2	replicate 3	replicate 1	replicate 2	replicate 3	replicate 1	replicate 2	replicate 3
	Ct 1	16.5106	16.6209	16.8118	16.3911	16.908	17.1877	17.0242	17.0499	16.7784	17.3823	17.507	17.3081	17.3119	17.8505	17.6718	17.5734	17.6681	17.1253
	Ct 2	16.7802	16.7135	17.0899	16.7891	16.8785	17.1269	16.1392	17.3479	16.6285	17.4436	17.4425	17.1743	17.5328	17.8165	17.6787	17.9241	17.7606	17.0576
	Ct average	16.6454	16.6672	16.9508	16.5901	16.8933	17.1573	16.5817	17.1989	16.7035	17.413	17.4747	17.2412	17.4223	17.8335	17.6753	17.7488	17.7143	17.0915
	IP samples
		Rif1*-HA
		WT			F225E			R230E			WT			6A			F225E/R230E
		replicate 1	replicate 2	replicate 3	replicate 1	replicate 2	replicate 3	replicate 1	replicate 2	replicate 3	replicate 1	replicate 2	replicate 3	replicate 1	replicate 2	replicate 3	replicate 1	replicate 2	replicate 3
	Ct 1	22.9145	22.5963	23.0899	22.5427	22.6569	22.867	23.0954	22.5533	22.5805	25.0087	24.3721	24.7079	25.2173	25.4664	24.943	25.6968	25.3279	25.2181
	Ct 2	23.0469	22.7947	23.0098	22.5461	22.3219	23.1063	22.6068	22.4732	22.9351	25.3005	24.6976	24.6782	25.0669	25.6374	25.012	25.8775	25.8088	26.1342
	Ct average	22.9807	22.6955	23.0498	22.5444	22.4894	22.9866	22.8511	22.5132	22.7578	25.1546	24.5349	24.693	25.1421	25.5519	24.9775	25.7871	25.5683	25.6761
	% of input	0.0123846	0.0153213	0.0145886	0.0161278	0.020672	0.0175876	0.0129634	0.0251314	0.0150474	0.00467227	0.00749366	0.00571181	0.00474374	0.00474819	0.00633587	0.00380371	0.00432225	0.00260472
	average	0.0140982			0.0181291			0.0177141			0.00595925			0.00527594			0.00357689
	SD	0.00152855			0.00232			0.00650757			0.00142688			0.000917933			0.000880946
	normalized average	0.0414945			0.0533586			0.0521369			0.0303196			0.026843			0.0181986
	normalized SD	0.00449891			0.00682833			0.0191534			0.0072597			0.00467028			0.00448209
Red values are plotted and depicted in the Figure 5H.
