# Supplementary material for: Telomere length regulation by Rif1 protein from Hansenula polymorpha
Source: eLife. 2022 Feb 7;11:e75010. doi: 10.7554/eLife.75010 (PMC8820739; doi:10.7554/eLife.75010)
Supplement: Figure 6—source data 1. [file elife-75010-fig6-data1.xlsx]

## Sheet: Fig. 6E
Figure 6E. ChIP analysis
	"1% of input" samples
TEL		Rif1-HA
		Stn1-Flag WT			Stn1∆C381-Flag			Stn1∆C221-Flag
		replicate 1	replicate 2	replicate 3	replicate 1	replicate 2	replicate 3	replicate 1	replicate 2	replicate 3
	Ct 1	17.2181	17.6829	18.0946	17.0783	17.6524	17.0703	16.7585	17.2946	17.2891
	Ct 2	17.2726	17.1504	17.276	16.843	17.1541	17.0734	16.8548	17.0467	17.272
	Ct average	17.2454	17.4167	17.6853	16.9607	17.4033	17.0718	16.8067	17.1707	17.2806
	IP samples
		Rif1-HA
		Stn1-Flag WT			Stn1∆C381-Flag			Stn1∆C221-Flag
		replicate 1	replicate 2	replicate 3	replicate 1	replicate 2	replicate 3	replicate 1	replicate 2	replicate 3
	Ct 1	19.3207	19.1495	18.7763	20.0061	20.2771	20.0625	20.0784	19.9158	20.683
	Ct 2	19.1636	19.405	20.0188	20.0423	20.0717	20.7745	20.4916	20.3884	20.1053
	Ct average	19.2422	19.2772	19.3976	20.0242	20.1744	20.4185	20.285	20.1521	20.3942
	% of input	0.250557	0.27537	0.305182	0.119614	0.146486	0.0982985	0.0897232	0.126619	0.115536
	average	0.277036			0.121466			0.110626
	SD	0.0273508			0.0241472			0.0189315
	normalized average	1			0.438448			0.39932
	normalized SD	0.0987264			0.0871624			0.0683359
	"1% of input" samples
ALA1		Rif1-HA
		Stn1-Flag WT			Stn1∆C381-Flag			Stn1∆C221-Flag
		replicate 1	replicate 2	replicate 3	replicate 1	replicate 2	replicate 3	replicate 1	replicate 2	replicate 3
	Ct 1	16.9527	16.9284	17.0899	17.0421	17.2192	17.1511	16.9606	16.8744	17.2275
	Ct 2	16.8016	16.8838	17.2922	17.0086	17.0466	17.2021	16.9109	17.5253	17.0609
	Ct average	16.8772	16.9061	17.1911	17.0254	17.1329	17.1766	16.9358	17.1999	17.1442
	IP samples
		Rif1-HA
		Stn1-Flag WT			Stn1∆C381-Flag			Stn1∆C221-Flag
		replicate 1	replicate 2	replicate 3	replicate 1	replicate 2	replicate 3	replicate 1	replicate 2	replicate 3
	Ct 1	25.1761	24.9004	24.6832	24.6787	25.1307	24.9806	25.1185	25.1044	24.4793
	Ct 2	25.3054	24.5855	24.7229	24.7365	25.1228	25.5292	24.8155	25.0943	24.9237
	Ct average	25.2407	24.7429	24.7031	24.7076	25.1268	25.2549	24.967	25.0993	24.7015
	% of input	0.00303609	0.00437398	0.00547849	0.00486877	0.00392298	0.00369991	0.00382255	0.00418814	0.00530924
	average	0.00429619			0.00416389			0.00443997
	SD	0.00122306			0.000620552			0.000774679
	normalized average	0.0155077			0.0150301			0.0160267
	normalized SD	0.0044148			0.00223997			0.00279631
Red values are plotted and depicted in the Figure 6E.

## Sheet: Fig. 6F
Figure 6F. ChIP analysis
TEL	"1% of input" samples
		no tag			Stn1-HA			Stn1-HA∆rif1			Stn1-HA			Stn1-HA∆ku70
		replicate 1	replicate 2	replicate 3	replicate 1	replicate 2	replicate 3	replicate 1	replicate 2	replicate 3	replicate 1	replicate 2	replicate 3	replicate 1	replicate 2	replicate 3
	Ct 1	18.668	17.8734	18.08	18.176	18.3604	18.3489	18.1279	17.7704	17.8402	18.2781	17.6467	17.5596	16.4581	16.6238	16.8608
	Ct 2	18.3915	18.0714	17.9145	18.347	18.2071	18.2175	18.1304	17.6098	17.8	17.9861	17.339	17.5271	16.393	16.6453	17.0234
	Ct average	18.5297	17.9724	17.9973	18.2615	18.2837	18.2832	18.1291	17.6901	17.8201	18.1321	17.4928	17.5434	16.4256	16.6346	16.9421
	IP samples
		no tag			Stn1-HA			Stn1-HA∆rif1			Stn1-HA			Stn1-HA∆ku70
		replicate 1	replicate 2	replicate 3	replicate 1	replicate 2	replicate 3	replicate 1	replicate 2	replicate 3	replicate 1	replicate 2	replicate 3	replicate 1	replicate 2	replicate 3
	Ct 1	26.2131	24.5847	24.6656	21.5261	20.5188	20.8973	24.231	24.3146	24.075	20.4878	20.0788	19.8179	19.986	20.2136	20.2498
	Ct 2	26.3915	24.5033	24.659	20.26	20.6912	21.1818	24.404	24.2202	24.2839	20.9581	20.0129	19.596	19.4581	19.9335	20.0698
	Ct average	26.3023	24.544	24.6623	20.893	20.605	21.0396	24.3175	24.2674	24.1794	20.723	20.0458	19.7069	19.7221	20.0736	20.1598
	% of input	0.00457324	0.0105137	0.00985441	0.161371	0.200092	0.147998	0.0137122	0.0104725	0.0121802	0.165985	0.1704	0.223203	0.101777	0.0922049	0.107487
	average	0.00831378			0.16982			0.0121217			0.186529			0.10049
	SD	0.00325613			0.0270553			0.00162065			0.031837			0.00772211
	normalized average	0.0489564			1			0.0713795			1			0.538735
	normalized SD	0.019174			0.159318			0.00954333			0.170681			0.0413989
ALA1	"1% of input" samples
		no tag			Stn1-HA			Stn1-HA∆rif1			Stn1-HA			Stn1-HA∆ku70
		replicate 1	replicate 2	replicate 3	replicate 1	replicate 2	replicate 3	replicate 1	replicate 2	replicate 3	replicate 1	replicate 2	replicate 3	replicate 1	replicate 2	replicate 3
	Ct 1	18.0546	17.8522	17.7285	18.034	18.0699	18.2698	18.0789	18.0373	17.9036	16.9206	16.2314	15.9021	16.1604	16.4645	16.2181
	Ct 2	18.1048	18.2807	17.9658	18.0309	18.0422	18.3866	18.3181	17.8885	17.8258	17.0189	16.324	16.2873	16.1097	16.4765	16.5408
	Ct average	18.0797	18.0664	17.8471	18.0324	18.056	18.3282	18.1985	17.9629	17.8647	16.9698	16.2777	16.0947	16.135	16.4705	16.3795
	IP samples
		no tag			Stn1-HA			Stn1-HA∆rif1			Stn1-HA			Stn1-HA∆ku70
		replicate 1	replicate 2	replicate 3	replicate 1	replicate 2	replicate 3	replicate 1	replicate 2	replicate 3	replicate 1	replicate 2	replicate 3	replicate 1	replicate 2	replicate 3
	Ct 1	25.8896	23.4137	24.4838	24.1566	24.1863	23.9023	24.3164	25.0859	24.4311	24.1007	22.7936	23.1886	23.2287	23.5453	23.3446
	Ct 2	26.2252	23.5401	24.3834	24.3725	24.4335	24.1056	24.4384	24.4764	24.2624	23.071	23.0753	23.106	23.4973	23.6475	23.5657
	Ct average	26.0574	23.4769	24.4336	24.2645	24.3099	24.0039	24.3774	24.7811	24.3468	23.5858	22.9345	23.1473	23.363	23.5964	23.4552
	% of input	0.00396707	0.0235121	0.0104058	0.0133033	0.0131041	0.0195628	0.0138027	0.00886118	0.0111868	0.0101947	0.00991084	0.0075328	0.0066706	0.00715979	0.00741314
	average	0.0126283			0.0153234			0.0112835			0.00921278			0.00708118
	SD	0.00996024			0.00367276			0.00247217			0.00146181			0.000377462
	normalized average	0.0743629			0.0902331			0.0664442			0.0493905			0.0379628
	normalized SD	0.0586517			0.0216274			0.0145576			0.00783689			0.00202361
Red values are plotted and depicted in the Figure 6F.
