# Supplementary figures and images for: Telomere length regulation by Rif1 protein from Hansenula polymorpha
Source: eLife journal article supplement (doi:10.7554/elife.75010), 2022-01-24

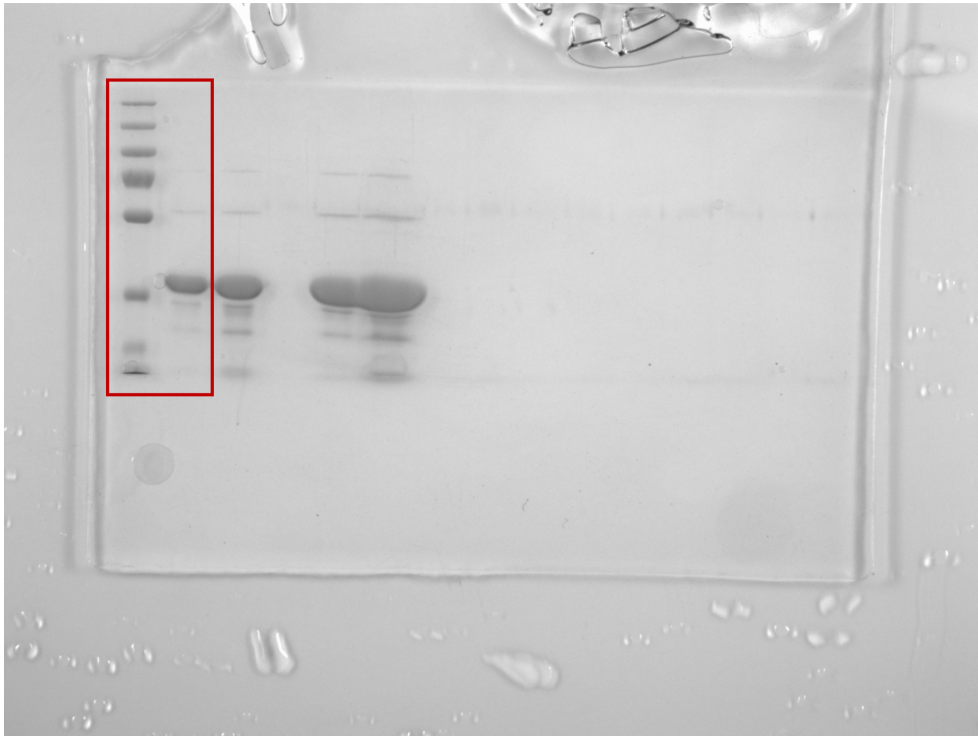

Red square marks the area shown in Figure 2B.

Supplement: fig2-data1 [file Fig. 2B labels.pdf › Figure 2 - source data 1/Fig. 2B labels.pdf]

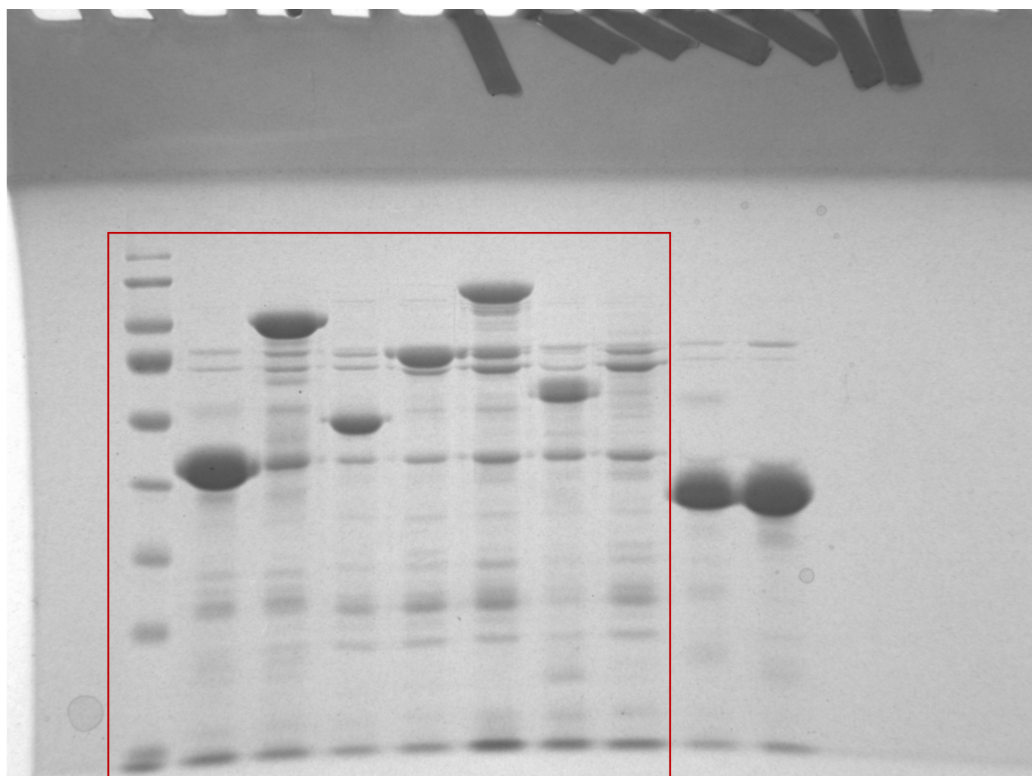

Red square marks the area shown in Figure 3B.

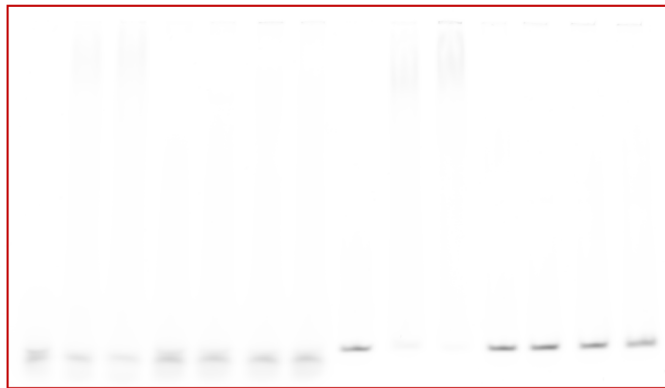

Red square marks the area shown in Figure 3C.

Supplement: fig3-data2 [file elife-75010-fig3-data2-v1.zip]

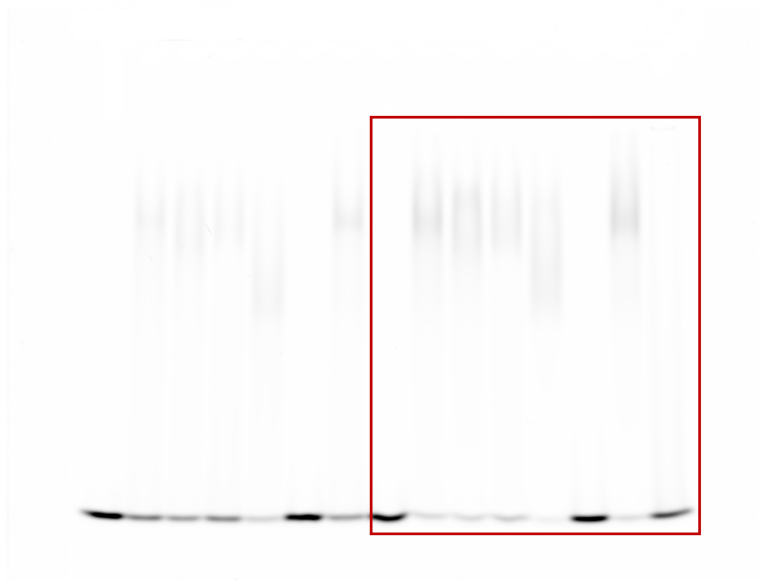

Red square marks the area shown in Figure 4 - figure supplement 1.

Supplement: fig4-figsupp1-data1 [file Fig. 4 - suppl. 1 labels.pdf › Figure 4 - figure supplement 1 - source data 1/Fig. 4 - suppl. 1 labels.pdf]
